# Supplementary material
Source: ML conference proceedings conference paper supplement (https://proceedings.neurips.cc/paper_files/paper/2022/hash/60dc26558762425a465cb0409fc3dc52-Abstract.html)
Supplement: Supplementary file 1 [file 60dc26558762425a465cb0409fc3dc52-Supplemental-Conference.zip]

Archive with 2,936 entries (1,622 files):
- Near-Optimal Multi-Agent Learning for Safe Coverage Control/
- Near-Optimal Multi-Agent Learning for Safe Coverage Control/Appendix Near-Optimal Multi-Agent Learning for Safe Coverage Control.pdf
- Near-Optimal Multi-Agent Learning for Safe Coverage Control/code/
- Near-Optimal Multi-Agent Learning for Safe Coverage Control/code/safe-multi-agent-coverage/
- Near-Optimal Multi-Agent Learning for Safe Coverage Control/code/safe-multi-agent-coverage/.gitignore
- Near-Optimal Multi-Agent Learning for Safe Coverage Control/code/safe-multi-agent-coverage/README.md
- Near-Optimal Multi-Agent Learning for Safe Coverage Control/code/safe-multi-agent-coverage/main.py
- Near-Optimal Multi-Agent Learning for Safe Coverage Control/code/safe-multi-agent-coverage/__init__.py
- Near-Optimal Multi-Agent Learning for Safe Coverage Control/code/safe-multi-agent-coverage/requirements.txt
- Near-Optimal Multi-Agent Learning for Safe Coverage Control/code/safe-multi-agent-coverage/Visualizations/
- Near-Optimal Multi-Agent Learning for Safe Coverage Control/code/safe-multi-agent-coverage/Visualizations/SafeMac-obstacles.mp4
- Near-Optimal Multi-Agent Learning for Safe Coverage Control/code/safe-multi-agent-coverage/Visualizations/MacOpt-gorilla.mp4
- Near-Optimal Multi-Agent Learning for Safe Coverage Control/code/safe-multi-agent-coverage/Visualizations/legend.txt
- Near-Optimal Multi-Agent Learning for Safe Coverage Control/code/safe-multi-agent-coverage/Visualizations/SafeMac-gorilla.mp4
- Near-Optimal Multi-Agent Learning for Safe Coverage Control/code/safe-multi-agent-coverage/apps/
- Near-Optimal Multi-Agent Learning for Safe Coverage Control/code/safe-multi-agent-coverage/apps/consolidate_data.py
- Near-Optimal Multi-Agent Learning for Safe Coverage Control/code/safe-multi-agent-coverage/apps/bar_chart.py
- Near-Optimal Multi-Agent Learning for Safe Coverage Control/code/safe-multi-agent-coverage/apps/plotting_script.py
- Near-Optimal Multi-Agent Learning for Safe Coverage Control/code/safe-multi-agent-coverage/utils/
- Near-Optimal Multi-Agent Learning for Safe Coverage Control/code/safe-multi-agent-coverage/utils/agent.py
- Near-Optimal Multi-Agent Learning for Safe Coverage Control/code/safe-multi-agent-coverage/utils/agent_helper.py
- Near-Optimal Multi-Agent Learning for Safe Coverage Control/code/safe-multi-agent-coverage/utils/common.py
- Near-Optimal Multi-Agent Learning for Safe Coverage Control/code/safe-multi-agent-coverage/utils/datatypes.py
- Near-Optimal Multi-Agent Learning for Safe Coverage Control/code/safe-multi-agent-coverage/utils/environement.py
- Near-Optimal Multi-Agent Learning for Safe Coverage Control/code/safe-multi-agent-coverage/utils/helper.py
- Near-Optimal Multi-Agent Learning for Safe Coverage Control/code/safe-multi-agent-coverage/utils/visu.py
- Near-Optimal Multi-Agent Learning for Safe Coverage Control/code/safe-multi-agent-coverage/utils/__init__.py
- Near-Optimal Multi-Agent Learning for Safe Coverage Control/code/safe-multi-agent-coverage/utils/central_graph.py
- Near-Optimal Multi-Agent Learning for Safe Coverage Control/code/safe-multi-agent-coverage/utils/ground_truth.py
- Near-Optimal Multi-Agent Learning for Safe Coverage Control/code/safe-multi-agent-coverage/utils/initializer.py
- Near-Optimal Multi-Agent Learning for Safe Coverage Control/code/safe-multi-agent-coverage/utils/__pycache__/
- Near-Optimal Multi-Agent Learning for Safe Coverage Control/code/safe-multi-agent-coverage/utils/__pycache__/helper.cpython-38.pyc
- Near-Optimal Multi-Agent Learning for Safe Coverage Control/code/safe-multi-agent-coverage/utils/__pycache__/__init__.cpython-38.pyc
- Near-Optimal Multi-Agent Learning for Safe Coverage Control/code/safe-multi-agent-coverage/utils/__pycache__/initializer.cpython-38.pyc
- Near-Optimal Multi-Agent Learning for Safe Coverage Control/code/safe-multi-agent-coverage/utils/__pycache__/agent.cpython-38.pyc
- Near-Optimal Multi-Agent Learning for Safe Coverage Control/code/safe-multi-agent-coverage/utils/__pycache__/datatypes.cpython-38.pyc
- Near-Optimal Multi-Agent Learning for Safe Coverage Control/code/safe-multi-agent-coverage/utils/__pycache__/agent_helper.cpython-38.pyc
- Near-Optimal Multi-Agent Learning for Safe Coverage Control/code/safe-multi-agent-coverage/utils/__pycache__/central_graph.cpython-38.pyc
- Near-Optimal Multi-Agent Learning for Safe Coverage Control/code/safe-multi-agent-coverage/utils/__pycache__/ground_truth.cpython-38.pyc
- Near-Optimal Multi-Agent Learning for Safe Coverage Control/code/safe-multi-agent-coverage/utils/__pycache__/visu.cpython-38.pyc
- Near-Optimal Multi-Agent Learning for Safe Coverage Control/code/safe-multi-agent-coverage/utils/__pycache__/environement.cpython-38.pyc
- Near-Optimal Multi-Agent Learning for Safe Coverage Control/code/safe-multi-agent-coverage/params/
- Near-Optimal Multi-Agent Learning for Safe Coverage Control/code/safe-multi-agent-coverage/params/smcc_UCB_gorilla.yaml
- Near-Optimal Multi-Agent Learning for Safe Coverage Control/code/safe-multi-agent-coverage/params/smcc_MacOpt_gorilla.yaml
- Near-Optimal Multi-Agent Learning for Safe Coverage Control/code/safe-multi-agent-coverage/params/smcc_TwoStage_GP.yaml
- Near-Optimal Multi-Agent Learning for Safe Coverage Control/code/safe-multi-agent-coverage/params/smcc_MacOpt_GP.yaml
- Near-Optimal Multi-Agent Learning for Safe Coverage Control/code/safe-multi-agent-coverage/params/smcc_UCB_GP.yaml
- Near-Optimal Multi-Agent Learning for Safe Coverage Control/code/safe-multi-agent-coverage/params/smcc_SafeMac_GP.yaml
- Near-Optimal Multi-Agent Learning for Safe Coverage Control/code/safe-multi-agent-coverage/params/smcc_PassiveMac_obstacles.yaml
- Near-Optimal Multi-Agent Learning for Safe Coverage Control/code/safe-multi-agent-coverage/params/smcc_TwoStage_obstacles.yaml
- Near-Optimal Multi-Agent Learning for Safe Coverage Control/code/safe-multi-agent-coverage/params/smcc_SafeMac_obstacles.yaml
- Near-Optimal Multi-Agent Learning for Safe Coverage Control/code/safe-multi-agent-coverage/params/smcc_SafeMac_gorilla.yaml
- Near-Optimal Multi-Agent Learning for Safe Coverage Control/code/safe-multi-agent-coverage/params/smcc_TwoStage_gorilla.yaml
- Near-Optimal Multi-Agent Learning for Safe Coverage Control/code/safe-multi-agent-coverage/params/smcc_PassiveMac_GP.yaml
- Near-Optimal Multi-Agent Learning for Safe Coverage Control/code/safe-multi-agent-coverage/params/smcc_PassiveMac_gorilla.yaml
- Near-Optimal Multi-Agent Learning for Safe Coverage Control/code/safe-multi-agent-coverage/experiments/
- Near-Optimal Multi-Agent Learning for Safe Coverage Control/code/safe-multi-agent-coverage/experiments/gorilla/
- Near-Optimal Multi-Agent Learning for Safe Coverage Control/code/safe-multi-agent-coverage/experiments/gorilla/environments/
- Near-Optimal Multi-Agent Learning for Safe Coverage Control/code/safe-multi-agent-coverage/experiments/gorilla/environments/env_3/
- Near-Optimal Multi-Agent Learning for Safe Coverage Control/code/safe-multi-agent-coverage/experiments/gorilla/environments/env_3/env.png
- Near-Optimal Multi-Agent Learning for Safe Coverage Control/code/safe-multi-agent-coverage/experiments/gorilla/environments/env_3/env_data.pkl
- Near-Optimal Multi-Agent Learning for Safe Coverage Control/code/safe-multi-agent-coverage/experiments/gorilla/environments/env_3/smcc_UCB_gorilla/
- Near-Optimal Multi-Agent Learning for Safe Coverage Control/code/safe-multi-agent-coverage/experiments/gorilla/environments/env_3/smcc_UCB_gorilla/data.pkl
- Near-Optimal Multi-Agent Learning for Safe Coverage Control/code/safe-multi-agent-coverage/experiments/gorilla/environments/env_3/smcc_UCB_gorilla/params.yaml
- Near-Optimal Multi-Agent Learning for Safe Coverage Control/code/safe-multi-agent-coverage/experiments/gorilla/environments/env_3/smcc_UCB_gorilla/3/
- Near-Optimal Multi-Agent Learning for Safe Coverage Control/code/safe-multi-agent-coverage/experiments/gorilla/environments/env_3/smcc_UCB_gorilla/3/data.pkl
- Near-Optimal Multi-Agent Learning for Safe Coverage Control/code/safe-multi-agent-coverage/experiments/gorilla/environments/env_3/smcc_UCB_gorilla/2/
- Near-Optimal Multi-Agent Learning for Safe Coverage Control/code/safe-multi-agent-coverage/experiments/gorilla/environments/env_3/smcc_UCB_gorilla/2/data.pkl
- Near-Optimal Multi-Agent Learning for Safe Coverage Control/code/safe-multi-agent-coverage/experiments/gorilla/environments/env_3/smcc_UCB_gorilla/0/
- Near-Optimal Multi-Agent Learning for Safe Coverage Control/code/safe-multi-agent-coverage/experiments/gorilla/environments/env_3/smcc_UCB_gorilla/0/data.pkl
- Near-Optimal Multi-Agent Learning for Safe Coverage Control/code/safe-multi-agent-coverage/experiments/gorilla/environments/env_3/smcc_UCB_gorilla/4/
- Near-Optimal Multi-Agent Learning for Safe Coverage Control/code/safe-multi-agent-coverage/experiments/gorilla/environments/env_3/smcc_UCB_gorilla/4/data.pkl
- Near-Optimal Multi-Agent Learning for Safe Coverage Control/code/safe-multi-agent-coverage/experiments/gorilla/environments/env_3/smcc_UCB_gorilla/1/
- Near-Optimal Multi-Agent Learning for Safe Coverage Control/code/safe-multi-agent-coverage/experiments/gorilla/environments/env_3/smcc_UCB_gorilla/1/data.pkl
- Near-Optimal Multi-Agent Learning for Safe Coverage Control/code/safe-multi-agent-coverage/experiments/gorilla/environments/env_3/smcc_MacOpt_gorilla/
- Near-Optimal Multi-Agent Learning for Safe Coverage Control/code/safe-multi-agent-coverage/experiments/gorilla/environments/env_3/smcc_MacOpt_gorilla/data.pkl
- Near-Optimal Multi-Agent Learning for Safe Coverage Control/code/safe-multi-agent-coverage/experiments/gorilla/environments/env_3/smcc_MacOpt_gorilla/params.yaml
- Near-Optimal Multi-Agent Learning for Safe Coverage Control/code/safe-multi-agent-coverage/experiments/gorilla/environments/env_3/smcc_MacOpt_gorilla/3/
- Near-Optimal Multi-Agent Learning for Safe Coverage Control/code/safe-multi-agent-coverage/experiments/gorilla/environments/env_3/smcc_MacOpt_gorilla/3/data.pkl
- Near-Optimal Multi-Agent Learning for Safe Coverage Control/code/safe-multi-agent-coverage/experiments/gorilla/environments/env_3/smcc_MacOpt_gorilla/4/
- Near-Optimal Multi-Agent Learning for Safe Coverage Control/code/safe-multi-agent-coverage/experiments/gorilla/environments/env_3/smcc_MacOpt_gorilla/4/data.pkl
- Near-Optimal Multi-Agent Learning for Safe Coverage Control/code/safe-multi-agent-coverage/experiments/gorilla/environments/env_3/smcc_MacOpt_gorilla/2/
- Near-Optimal Multi-Agent Learning for Safe Coverage Control/code/safe-multi-agent-coverage/experiments/gorilla/environments/env_3/smcc_MacOpt_gorilla/2/data.pkl
- Near-Optimal Multi-Agent Learning for Safe Coverage Control/code/safe-multi-agent-coverage/experiments/gorilla/environments/env_3/smcc_MacOpt_gorilla/0/
- Near-Optimal Multi-Agent Learning for Safe Coverage Control/code/safe-multi-agent-coverage/experiments/gorilla/environments/env_3/smcc_MacOpt_gorilla/0/data.pkl
- Near-Optimal Multi-Agent Learning for Safe Coverage Control/code/safe-multi-agent-coverage/experiments/gorilla/environments/env_3/smcc_MacOpt_gorilla/1/
- Near-Optimal Multi-Agent Learning for Safe Coverage Control/code/safe-multi-agent-coverage/experiments/gorilla/environments/env_3/smcc_MacOpt_gorilla/1/data.pkl
- Near-Optimal Multi-Agent Learning for Safe Coverage Control/code/safe-multi-agent-coverage/experiments/gorilla/environments/env_10/
- Near-Optimal Multi-Agent Learning for Safe Coverage Control/code/safe-multi-agent-coverage/experiments/gorilla/environments/env_10/env.png
- Near-Optimal Multi-Agent Learning for Safe Coverage Control/code/safe-multi-agent-coverage/experiments/gorilla/environments/env_10/env_data.pkl
- Near-Optimal Multi-Agent Learning for Safe Coverage Control/code/safe-multi-agent-coverage/experiments/gorilla/environments/env_10/smcc_MacOpt_gorilla/
- Near-Optimal Multi-Agent Learning for Safe Coverage Control/code/safe-multi-agent-coverage/experiments/gorilla/environments/env_10/smcc_MacOpt_gorilla/data.pkl
- Near-Optimal Multi-Agent Learning for Safe Coverage Control/code/safe-multi-agent-coverage/experiments/gorilla/environments/env_10/smcc_MacOpt_gorilla/params.yaml
- Near-Optimal Multi-Agent Learning for Safe Coverage Control/code/safe-multi-agent-coverage/experiments/gorilla/environments/env_10/smcc_MacOpt_gorilla/1/
- Near-Optimal Multi-Agent Learning for Safe Coverage Control/code/safe-multi-agent-coverage/experiments/gorilla/environments/env_10/smcc_MacOpt_gorilla/1/data.pkl
- Near-Optimal Multi-Agent Learning for Safe Coverage Control/code/safe-multi-agent-coverage/experiments/gorilla/environments/env_10/smcc_MacOpt_gorilla/2/
- Near-Optimal Multi-Agent Learning for Safe Coverage Control/code/safe-multi-agent-coverage/experiments/gorilla/environments/env_10/smcc_MacOpt_gorilla/2/data.pkl
- Near-Optimal Multi-Agent Learning for Safe Coverage Control/code/safe-multi-agent-coverage/experiments/gorilla/environments/env_10/smcc_MacOpt_gorilla/4/
- Near-Optimal Multi-Agent Learning for Safe Coverage Control/code/safe-multi-agent-coverage/experiments/gorilla/environments/env_10/smcc_MacOpt_gorilla/4/data.pkl
- Near-Optimal Multi-Agent Learning for Safe Coverage Control/code/safe-multi-agent-coverage/experiments/gorilla/environments/env_10/smcc_MacOpt_gorilla/0/
- Near-Optimal Multi-Agent Learning for Safe Coverage Control/code/safe-multi-agent-coverage/experiments/gorilla/environments/env_10/smcc_MacOpt_gorilla/0/data.pkl
- Near-Optimal Multi-Agent Learning for Safe Coverage Control/code/safe-multi-agent-coverage/experiments/gorilla/environments/env_10/smcc_MacOpt_gorilla/3/
- Near-Optimal Multi-Agent Learning for Safe Coverage Control/code/safe-multi-agent-coverage/experiments/gorilla/environments/env_10/smcc_MacOpt_gorilla/3/data.pkl
- Near-Optimal Multi-Agent Learning for Safe Coverage Control/code/safe-multi-agent-coverage/experiments/gorilla/environments/env_10/smcc_UCB_gorilla/
- Near-Optimal Multi-Agent Learning for Safe Coverage Control/code/safe-multi-agent-coverage/experiments/gorilla/environments/env_10/smcc_UCB_gorilla/data.pkl
- Near-Optimal Multi-Agent Learning for Safe Coverage Control/code/safe-multi-agent-coverage/experiments/gorilla/environments/env_10/smcc_UCB_gorilla/params.yaml
- Near-Optimal Multi-Agent Learning for Safe Coverage Control/code/safe-multi-agent-coverage/experiments/gorilla/environments/env_10/smcc_UCB_gorilla/2/
- Near-Optimal Multi-Agent Learning for Safe Coverage Control/code/safe-multi-agent-coverage/experiments/gorilla/environments/env_10/smcc_UCB_gorilla/2/data.pkl
- Near-Optimal Multi-Agent Learning for Safe Coverage Control/code/safe-multi-agent-coverage/experiments/gorilla/environments/env_10/smcc_UCB_gorilla/3/
- Near-Optimal Multi-Agent Learning for Safe Coverage Control/code/safe-multi-agent-coverage/experiments/gorilla/environments/env_10/smcc_UCB_gorilla/3/data.pkl
- Near-Optimal Multi-Agent Learning for Safe Coverage Control/code/safe-multi-agent-coverage/experiments/gorilla/environments/env_10/smcc_UCB_gorilla/1/
- Near-Optimal Multi-Agent Learning for Safe Coverage Control/code/safe-multi-agent-coverage/experiments/gorilla/environments/env_10/smcc_UCB_gorilla/1/data.pkl
- Near-Optimal Multi-Agent Learning for Safe Coverage Control/code/safe-multi-agent-coverage/experiments/gorilla/environments/env_10/smcc_UCB_gorilla/0/
- Near-Optimal Multi-Agent Learning for Safe Coverage Control/code/safe-multi-agent-coverage/experiments/gorilla/environments/env_10/smcc_UCB_gorilla/0/data.pkl
- Near-Optimal Multi-Agent Learning for Safe Coverage Control/code/safe-multi-agent-coverage/experiments/gorilla/environments/env_10/smcc_UCB_gorilla/4/
- Near-Optimal Multi-Agent Learning for Safe Coverage Control/code/safe-multi-agent-coverage/experiments/gorilla/environments/env_10/smcc_UCB_gorilla/4/data.pkl
- Near-Optimal Multi-Agent Learning for Safe Coverage Control/code/safe-multi-agent-coverage/experiments/gorilla/environments/env_1/
- Near-Optimal Multi-Agent Learning for Safe Coverage Control/code/safe-multi-agent-coverage/experiments/gorilla/environments/env_1/env.png
- Near-Optimal Multi-Agent Learning for Safe Coverage Control/code/safe-multi-agent-coverage/experiments/gorilla/environments/env_1/env_data.pkl
- Near-Optimal Multi-Agent Learning for Safe Coverage Control/code/safe-multi-agent-coverage/experiments/gorilla/environments/env_1/name.png
- Near-Optimal Multi-Agent Learning for Safe Coverage Control/code/safe-multi-agent-coverage/experiments/gorilla/environments/env_1/smcc_UCB_gorilla/
- Near-Optimal Multi-Agent Learning for Safe Coverage Control/code/safe-multi-agent-coverage/experiments/gorilla/environments/env_1/smcc_UCB_gorilla/data.pkl
- Near-Optimal Multi-Agent Learning for Safe Coverage Control/code/safe-multi-agent-coverage/experiments/gorilla/environments/env_1/smcc_UCB_gorilla/params.yaml
- Near-Optimal Multi-Agent Learning for Safe Coverage Control/code/safe-multi-agent-coverage/experiments/gorilla/environments/env_1/smcc_UCB_gorilla/4/
- Near-Optimal Multi-Agent Learning for Safe Coverage Control/code/safe-multi-agent-coverage/experiments/gorilla/environments/env_1/smcc_UCB_gorilla/4/data.pkl
- Near-Optimal Multi-Agent Learning for Safe Coverage Control/code/safe-multi-agent-coverage/experiments/gorilla/environments/env_1/smcc_UCB_gorilla/0/
- Near-Optimal Multi-Agent Learning for Safe Coverage Control/code/safe-multi-agent-coverage/experiments/gorilla/environments/env_1/smcc_UCB_gorilla/0/data.pkl
- Near-Optimal Multi-Agent Learning for Safe Coverage Control/code/safe-multi-agent-coverage/experiments/gorilla/environments/env_1/smcc_UCB_gorilla/3/
- Near-Optimal Multi-Agent Learning for Safe Coverage Control/code/safe-multi-agent-coverage/experiments/gorilla/environments/env_1/smcc_UCB_gorilla/3/data.pkl
- Near-Optimal Multi-Agent Learning for Safe Coverage Control/code/safe-multi-agent-coverage/experiments/gorilla/environments/env_1/smcc_UCB_gorilla/1/
- Near-Optimal Multi-Agent Learning for Safe Coverage Control/code/safe-multi-agent-coverage/experiments/gorilla/environments/env_1/smcc_UCB_gorilla/1/data.pkl
- Near-Optimal Multi-Agent Learning for Safe Coverage Control/code/safe-multi-agent-coverage/experiments/gorilla/environments/env_1/smcc_UCB_gorilla/2/
- Near-Optimal Multi-Agent Learning for Safe Coverage Control/code/safe-multi-agent-coverage/experiments/gorilla/environments/env_1/smcc_UCB_gorilla/2/data.pkl
- Near-Optimal Multi-Agent Learning for Safe Coverage Control/code/safe-multi-agent-coverage/experiments/gorilla/environments/env_1/smcc_MacOpt_gorilla/
- Near-Optimal Multi-Agent Learning for Safe Coverage Control/code/safe-multi-agent-coverage/experiments/gorilla/environments/env_1/smcc_MacOpt_gorilla/data.pkl
- Near-Optimal Multi-Agent Learning for Safe Coverage Control/code/safe-multi-agent-coverage/experiments/gorilla/environments/env_1/smcc_MacOpt_gorilla/params.yaml
- Near-Optimal Multi-Agent Learning for Safe Coverage Control/code/safe-multi-agent-coverage/experiments/gorilla/environments/env_1/smcc_MacOpt_gorilla/3/
- Near-Optimal Multi-Agent Learning for Safe Coverage Control/code/safe-multi-agent-coverage/experiments/gorilla/environments/env_1/smcc_MacOpt_gorilla/3/data.pkl
- Near-Optimal Multi-Agent Learning for Safe Coverage Control/code/safe-multi-agent-coverage/experiments/gorilla/environments/env_1/smcc_MacOpt_gorilla/4/
- Near-Optimal Multi-Agent Learning for Safe Coverage Control/code/safe-multi-agent-coverage/experiments/gorilla/environments/env_1/smcc_MacOpt_gorilla/4/data.pkl
- Near-Optimal Multi-Agent Learning for Safe Coverage Control/code/safe-multi-agent-coverage/experiments/gorilla/environments/env_1/smcc_MacOpt_gorilla/2/
- Near-Optimal Multi-Agent Learning for Safe Coverage Control/code/safe-multi-agent-coverage/experiments/gorilla/environments/env_1/smcc_MacOpt_gorilla/2/data.pkl
- Near-Optimal Multi-Agent Learning for Safe Coverage Control/code/safe-multi-agent-coverage/experiments/gorilla/environments/env_1/smcc_MacOpt_gorilla/1/
- Near-Optimal Multi-Agent Learning for Safe Coverage Control/code/safe-multi-agent-coverage/experiments/gorilla/environments/env_1/smcc_MacOpt_gorilla/1/video.mp4
- Near-Optimal Multi-Agent Learning for Safe Coverage Control/code/safe-multi-agent-coverage/experiments/gorilla/environments/env_1/smcc_MacOpt_gorilla/1/Fx.png
- Near-Optimal Multi-Agent Learning for Safe Coverage Control/code/safe-multi-agent-coverage/experiments/gorilla/environments/env_1/smcc_MacOpt_gorilla/1/sigma.png
- Near-Optimal Multi-Agent Learning for Safe Coverage Control/code/safe-multi-agent-coverage/experiments/gorilla/environments/env_1/smcc_MacOpt_gorilla/1/data.pkl
- Near-Optimal Multi-Agent Learning for Safe Coverage Control/code/safe-multi-agent-coverage/experiments/gorilla/environments/env_1/smcc_MacOpt_gorilla/0/
- Near-Optimal Multi-Agent Learning for Safe Coverage Control/code/safe-multi-agent-coverage/experiments/gorilla/environments/env_1/smcc_MacOpt_gorilla/0/Fx.png
- Near-Optimal Multi-Agent Learning for Safe Coverage Control/code/safe-multi-agent-coverage/experiments/gorilla/environments/env_1/smcc_MacOpt_gorilla/0/data.pkl
- Near-Optimal Multi-Agent Learning for Safe Coverage Control/code/safe-multi-agent-coverage/experiments/gorilla/environments/env_1/smcc_MacOpt_gorilla/0/sigma.png
- Near-Optimal Multi-Agent Learning for Safe Coverage Control/code/safe-multi-agent-coverage/experiments/gorilla/environments/env_1/smcc_SafeMac_gorilla/
- Near-Optimal Multi-Agent Learning for Safe Coverage Control/code/safe-multi-agent-coverage/experiments/gorilla/environments/env_1/smcc_SafeMac_gorilla/1/
- Near-Optimal Multi-Agent Learning for Safe Coverage Control/code/safe-multi-agent-coverage/experiments/gorilla/environments/env_1/smcc_PassiveMac_gorilla/
- Near-Optimal Multi-Agent Learning for Safe Coverage Control/code/safe-multi-agent-coverage/experiments/gorilla/environments/env_1/smcc_PassiveMac_gorilla/1/
- Near-Optimal Multi-Agent Learning for Safe Coverage Control/code/safe-multi-agent-coverage/experiments/gorilla/environments/env_1/smcc_TwoStage_gorilla/
- Near-Optimal Multi-Agent Learning for Safe Coverage Control/code/safe-multi-agent-coverage/experiments/gorilla/environments/env_1/smcc_TwoStage_gorilla/1/
- Near-Optimal Multi-Agent Learning for Safe Coverage Control/code/safe-multi-agent-coverage/experiments/gorilla/environments/env_2/
- Near-Optimal Multi-Agent Learning for Safe Coverage Control/code/safe-multi-agent-coverage/experiments/gorilla/environments/env_2/env_data.pkl
- Near-Optimal Multi-Agent Learning for Safe Coverage Control/code/safe-multi-agent-coverage/experiments/gorilla/environments/env_2/env.png
- Near-Optimal Multi-Agent Learning for Safe Coverage Control/code/safe-multi-agent-coverage/experiments/gorilla/environments/env_2/smcc_UCB_gorilla/
- Near-Optimal Multi-Agent Learning for Safe Coverage Control/code/safe-multi-agent-coverage/experiments/gorilla/environments/env_2/smcc_UCB_gorilla/data.pkl
- Near-Optimal Multi-Agent Learning for Safe Coverage Control/code/safe-multi-agent-coverage/experiments/gorilla/environments/env_2/smcc_UCB_gorilla/params.yaml
- Near-Optimal Multi-Agent Learning for Safe Coverage Control/code/safe-multi-agent-coverage/experiments/gorilla/environments/env_2/smcc_UCB_gorilla/1/
- Near-Optimal Multi-Agent Learning for Safe Coverage Control/code/safe-multi-agent-coverage/experiments/gorilla/environments/env_2/smcc_UCB_gorilla/1/data.pkl
- Near-Optimal Multi-Agent Learning for Safe Coverage Control/code/safe-multi-agent-coverage/experiments/gorilla/environments/env_2/smcc_UCB_gorilla/2/
- Near-Optimal Multi-Agent Learning for Safe Coverage Control/code/safe-multi-agent-coverage/experiments/gorilla/environments/env_2/smcc_UCB_gorilla/2/data.pkl
- Near-Optimal Multi-Agent Learning for Safe Coverage Control/code/safe-multi-agent-coverage/experiments/gorilla/environments/env_2/smcc_UCB_gorilla/4/
- Near-Optimal Multi-Agent Learning for Safe Coverage Control/code/safe-multi-agent-coverage/experiments/gorilla/environments/env_2/smcc_UCB_gorilla/4/data.pkl
- Near-Optimal Multi-Agent Learning for Safe Coverage Control/code/safe-multi-agent-coverage/experiments/gorilla/environments/env_2/smcc_UCB_gorilla/0/
- Near-Optimal Multi-Agent Learning for Safe Coverage Control/code/safe-multi-agent-coverage/experiments/gorilla/environments/env_2/smcc_UCB_gorilla/0/data.pkl
- Near-Optimal Multi-Agent Learning for Safe Coverage Control/code/safe-multi-agent-coverage/experiments/gorilla/environments/env_2/smcc_UCB_gorilla/3/
- Near-Optimal Multi-Agent Learning for Safe Coverage Control/code/safe-multi-agent-coverage/experiments/gorilla/environments/env_2/smcc_UCB_gorilla/3/data.pkl
- Near-Optimal Multi-Agent Learning for Safe Coverage Control/code/safe-multi-agent-coverage/experiments/gorilla/environments/env_2/smcc_MacOpt_gorilla/
- Near-Optimal Multi-Agent Learning for Safe Coverage Control/code/safe-multi-agent-coverage/experiments/gorilla/environments/env_2/smcc_MacOpt_gorilla/data.pkl
- Near-Optimal Multi-Agent Learning for Safe Coverage Control/code/safe-multi-agent-coverage/experiments/gorilla/environments/env_2/smcc_MacOpt_gorilla/params.yaml
- Near-Optimal Multi-Agent Learning for Safe Coverage Control/code/safe-multi-agent-coverage/experiments/gorilla/environments/env_2/smcc_MacOpt_gorilla/2/
- Near-Optimal Multi-Agent Learning for Safe Coverage Control/code/safe-multi-agent-coverage/experiments/gorilla/environments/env_2/smcc_MacOpt_gorilla/2/data.pkl
- Near-Optimal Multi-Agent Learning for Safe Coverage Control/code/safe-multi-agent-coverage/experiments/gorilla/environments/env_2/smcc_MacOpt_gorilla/0/
- Near-Optimal Multi-Agent Learning for Safe Coverage Control/code/safe-multi-agent-coverage/experiments/gorilla/environments/env_2/smcc_MacOpt_gorilla/0/data.pkl
- Near-Optimal Multi-Agent Learning for Safe Coverage Control/code/safe-multi-agent-coverage/experiments/gorilla/environments/env_2/smcc_MacOpt_gorilla/1/
- Near-Optimal Multi-Agent Learning for Safe Coverage Control/code/safe-multi-agent-coverage/experiments/gorilla/environments/env_2/smcc_MacOpt_gorilla/1/data.pkl
- Near-Optimal Multi-Agent Learning for Safe Coverage Control/code/safe-multi-agent-coverage/experiments/gorilla/environments/env_2/smcc_MacOpt_gorilla/3/
- Near-Optimal Multi-Agent Learning for Safe Coverage Control/code/safe-multi-agent-coverage/experiments/gorilla/environments/env_2/smcc_MacOpt_gorilla/3/data.pkl
- Near-Optimal Multi-Agent Learning for Safe Coverage Control/code/safe-multi-agent-coverage/experiments/gorilla/environments/env_2/smcc_MacOpt_gorilla/4/
- Near-Optimal Multi-Agent Learning for Safe Coverage Control/code/safe-multi-agent-coverage/experiments/gorilla/environments/env_2/smcc_MacOpt_gorilla/4/data.pkl
- Near-Optimal Multi-Agent Learning for Safe Coverage Control/code/safe-multi-agent-coverage/experiments/gorilla/environments/env_4/
- Near-Optimal Multi-Agent Learning for Safe Coverage Control/code/safe-multi-agent-coverage/experiments/gorilla/environments/env_4/env.png
- Near-Optimal Multi-Agent Learning for Safe Coverage Control/code/safe-multi-agent-coverage/experiments/gorilla/environments/env_4/env_data.pkl
- Near-Optimal Multi-Agent Learning for Safe Coverage Control/code/safe-multi-agent-coverage/experiments/gorilla/environments/env_4/smcc_UCB_gorilla/
- Near-Optimal Multi-Agent Learning for Safe Coverage Control/code/safe-multi-agent-coverage/experiments/gorilla/environments/env_4/smcc_UCB_gorilla/data.pkl
- Near-Optimal Multi-Agent Learning for Safe Coverage Control/code/safe-multi-agent-coverage/experiments/gorilla/environments/env_4/smcc_UCB_gorilla/params.yaml
- Near-Optimal Multi-Agent Learning for Safe Coverage Control/code/safe-multi-agent-coverage/experiments/gorilla/environments/env_4/smcc_UCB_gorilla/1/
- Near-Optimal Multi-Agent Learning for Safe Coverage Control/code/safe-multi-agent-coverage/experiments/gorilla/environments/env_4/smcc_UCB_gorilla/1/data.pkl
- Near-Optimal Multi-Agent Learning for Safe Coverage Control/code/safe-multi-agent-coverage/experiments/gorilla/environments/env_4/smcc_UCB_gorilla/3/
- Near-Optimal Multi-Agent Learning for Safe Coverage Control/code/safe-multi-agent-coverage/experiments/gorilla/environments/env_4/smcc_UCB_gorilla/3/data.pkl
- Near-Optimal Multi-Agent Learning for Safe Coverage Control/code/safe-multi-agent-coverage/experiments/gorilla/environments/env_4/smcc_UCB_gorilla/4/
- Near-Optimal Multi-Agent Learning for Safe Coverage Control/code/safe-multi-agent-coverage/experiments/gorilla/environments/env_4/smcc_UCB_gorilla/4/data.pkl
- Near-Optimal Multi-Agent Learning for Safe Coverage Control/code/safe-multi-agent-coverage/experiments/gorilla/environments/env_4/smcc_UCB_gorilla/0/
- Near-Optimal Multi-Agent Learning for Safe Coverage Control/code/safe-multi-agent-coverage/experiments/gorilla/environments/env_4/smcc_UCB_gorilla/0/data.pkl
- Near-Optimal Multi-Agent Learning for Safe Coverage Control/code/safe-multi-agent-coverage/experiments/gorilla/environments/env_4/smcc_UCB_gorilla/2/
- Near-Optimal Multi-Agent Learning for Safe Coverage Control/code/safe-multi-agent-coverage/experiments/gorilla/environments/env_4/smcc_UCB_gorilla/2/data.pkl
- Near-Optimal Multi-Agent Learning for Safe Coverage Control/code/safe-multi-agent-coverage/experiments/gorilla/environments/env_4/smcc_MacOpt_gorilla/
- Near-Optimal Multi-Agent Learning for Safe Coverage Control/code/safe-multi-agent-coverage/experiments/gorilla/environments/env_4/smcc_MacOpt_gorilla/data.pkl
- Near-Optimal Multi-Agent Learning for Safe Coverage Control/code/safe-multi-agent-coverage/experiments/gorilla/environments/env_4/smcc_MacOpt_gorilla/params.yaml
- Near-Optimal Multi-Agent Learning for Safe Coverage Control/code/safe-multi-agent-coverage/experiments/gorilla/environments/env_4/smcc_MacOpt_gorilla/3/
- Near-Optimal Multi-Agent Learning for Safe Coverage Control/code/safe-multi-agent-coverage/experiments/gorilla/environments/env_4/smcc_MacOpt_gorilla/3/data.pkl
- Near-Optimal Multi-Agent Learning for Safe Coverage Control/code/safe-multi-agent-coverage/experiments/gorilla/environments/env_4/smcc_MacOpt_gorilla/2/
- Near-Optimal Multi-Agent Learning for Safe Coverage Control/code/safe-multi-agent-coverage/experiments/gorilla/environments/env_4/smcc_MacOpt_gorilla/2/data.pkl
- Near-Optimal Multi-Agent Learning for Safe Coverage Control/code/safe-multi-agent-coverage/experiments/gorilla/environments/env_4/smcc_MacOpt_gorilla/4/
- Near-Optimal Multi-Agent Learning for Safe Coverage Control/code/safe-multi-agent-coverage/experiments/gorilla/environments/env_4/smcc_MacOpt_gorilla/4/data.pkl
- Near-Optimal Multi-Agent Learning for Safe Coverage Control/code/safe-multi-agent-coverage/experiments/gorilla/environments/env_4/smcc_MacOpt_gorilla/0/
- Near-Optimal Multi-Agent Learning for Safe Coverage Control/code/safe-multi-agent-coverage/experiments/gorilla/environments/env_4/smcc_MacOpt_gorilla/0/data.pkl
- Near-Optimal Multi-Agent Learning for Safe Coverage Control/code/safe-multi-agent-coverage/experiments/gorilla/environments/env_4/smcc_MacOpt_gorilla/1/
- Near-Optimal Multi-Agent Learning for Safe Coverage Control/code/safe-multi-agent-coverage/experiments/gorilla/environments/env_4/smcc_MacOpt_gorilla/1/data.pkl
- Near-Optimal Multi-Agent Learning for Safe Coverage Control/code/safe-multi-agent-coverage/experiments/gorilla/environments/env_5/
- Near-Optimal Multi-Agent Learning for Safe Coverage Control/code/safe-multi-agent-coverage/experiments/gorilla/environments/env_5/env.png
- Near-Optimal Multi-Agent Learning for Safe Coverage Control/code/safe-multi-agent-coverage/experiments/gorilla/environments/env_5/env_data.pkl
- Near-Optimal Multi-Agent Learning for Safe Coverage Control/code/safe-multi-agent-coverage/experiments/gorilla/environments/env_5/smcc_UCB_gorilla/
- Near-Optimal Multi-Agent Learning for Safe Coverage Control/code/safe-multi-agent-coverage/experiments/gorilla/environments/env_5/smcc_UCB_gorilla/data.pkl
- Near-Optimal Multi-Agent Learning for Safe Coverage Control/code/safe-multi-agent-coverage/experiments/gorilla/environments/env_5/smcc_UCB_gorilla/params.yaml
- Near-Optimal Multi-Agent Learning for Safe Coverage Control/code/safe-multi-agent-coverage/experiments/gorilla/environments/env_5/smcc_UCB_gorilla/0/
- Near-Optimal Multi-Agent Learning for Safe Coverage Control/code/safe-multi-agent-coverage/experiments/gorilla/environments/env_5/smcc_UCB_gorilla/0/data.pkl
- Near-Optimal Multi-Agent Learning for Safe Coverage Control/code/safe-multi-agent-coverage/experiments/gorilla/environments/env_5/smcc_UCB_gorilla/2/
- Near-Optimal Multi-Agent Learning for Safe Coverage Control/code/safe-multi-agent-coverage/experiments/gorilla/environments/env_5/smcc_UCB_gorilla/2/data.pkl
- Near-Optimal Multi-Agent Learning for Safe Coverage Control/code/safe-multi-agent-coverage/experiments/gorilla/environments/env_5/smcc_UCB_gorilla/4/
- Near-Optimal Multi-Agent Learning for Safe Coverage Control/code/safe-multi-agent-coverage/experiments/gorilla/environments/env_5/smcc_UCB_gorilla/4/data.pkl
- Near-Optimal Multi-Agent Learning for Safe Coverage Control/code/safe-multi-agent-coverage/experiments/gorilla/environments/env_5/smcc_UCB_gorilla/1/
- Near-Optimal Multi-Agent Learning for Safe Coverage Control/code/safe-multi-agent-coverage/experiments/gorilla/environments/env_5/smcc_UCB_gorilla/1/data.pkl
- Near-Optimal Multi-Agent Learning for Safe Coverage Control/code/safe-multi-agent-coverage/experiments/gorilla/environments/env_5/smcc_UCB_gorilla/3/
- Near-Optimal Multi-Agent Learning for Safe Coverage Control/code/safe-multi-agent-coverage/experiments/gorilla/environments/env_5/smcc_UCB_gorilla/3/data.pkl
- Near-Optimal Multi-Agent Learning for Safe Coverage Control/code/safe-multi-agent-coverage/experiments/gorilla/environments/env_5/smcc_MacOpt_gorilla/
- Near-Optimal Multi-Agent Learning for Safe Coverage Control/code/safe-multi-agent-coverage/experiments/gorilla/environments/env_5/smcc_MacOpt_gorilla/data.pkl
- Near-Optimal Multi-Agent Learning for Safe Coverage Control/code/safe-multi-agent-coverage/experiments/gorilla/environments/env_5/smcc_MacOpt_gorilla/params.yaml
- Near-Optimal Multi-Agent Learning for Safe Coverage Control/code/safe-multi-agent-coverage/experiments/gorilla/environments/env_5/smcc_MacOpt_gorilla/2/
- Near-Optimal Multi-Agent Learning for Safe Coverage Control/code/safe-multi-agent-coverage/experiments/gorilla/environments/env_5/smcc_MacOpt_gorilla/2/data.pkl
- Near-Optimal Multi-Agent Learning for Safe Coverage Control/code/safe-multi-agent-coverage/experiments/gorilla/environments/env_5/smcc_MacOpt_gorilla/3/
- Near-Optimal Multi-Agent Learning for Safe Coverage Control/code/safe-multi-agent-coverage/experiments/gorilla/environments/env_5/smcc_MacOpt_gorilla/3/data.pkl
- Near-Optimal Multi-Agent Learning for Safe Coverage Control/code/safe-multi-agent-coverage/experiments/gorilla/environments/env_5/smcc_MacOpt_gorilla/4/
- Near-Optimal Multi-Agent Learning for Safe Coverage Control/code/safe-multi-agent-coverage/experiments/gorilla/environments/env_5/smcc_MacOpt_gorilla/4/data.pkl
- Near-Optimal Multi-Agent Learning for Safe Coverage Control/code/safe-multi-agent-coverage/experiments/gorilla/environments/env_5/smcc_MacOpt_gorilla/0/
- Near-Optimal Multi-Agent Learning for Safe Coverage Control/code/safe-multi-agent-coverage/experiments/gorilla/environments/env_5/smcc_MacOpt_gorilla/0/data.pkl
- Near-Optimal Multi-Agent Learning for Safe Coverage Control/code/safe-multi-agent-coverage/experiments/gorilla/environments/env_5/smcc_MacOpt_gorilla/1/
- Near-Optimal Multi-Agent Learning for Safe Coverage Control/code/safe-multi-agent-coverage/experiments/gorilla/environments/env_5/smcc_MacOpt_gorilla/1/data.pkl
- Near-Optimal Multi-Agent Learning for Safe Coverage Control/code/safe-multi-agent-coverage/experiments/gorilla/environments/env_6/
- Near-Optimal Multi-Agent Learning for Safe Coverage Control/code/safe-multi-agent-coverage/experiments/gorilla/environments/env_6/env.png
- Near-Optimal Multi-Agent Learning for Safe Coverage Control/code/safe-multi-agent-coverage/experiments/gorilla/environments/env_6/env_data.pkl
- Near-Optimal Multi-Agent Learning for Safe Coverage Control/code/safe-multi-agent-coverage/experiments/gorilla/environments/env_6/smcc_UCB_gorilla/
- Near-Optimal Multi-Agent Learning for Safe Coverage Control/code/safe-multi-agent-coverage/experiments/gorilla/environments/env_6/smcc_UCB_gorilla/data.pkl
- Near-Optimal Multi-Agent Learning for Safe Coverage Control/code/safe-multi-agent-coverage/experiments/gorilla/environments/env_6/smcc_UCB_gorilla/params.yaml
- Near-Optimal Multi-Agent Learning for Safe Coverage Control/code/safe-multi-agent-coverage/experiments/gorilla/environments/env_6/smcc_UCB_gorilla/3/
- Near-Optimal Multi-Agent Learning for Safe Coverage Control/code/safe-multi-agent-coverage/experiments/gorilla/environments/env_6/smcc_UCB_gorilla/3/data.pkl
- Near-Optimal Multi-Agent Learning for Safe Coverage Control/code/safe-multi-agent-coverage/experiments/gorilla/environments/env_6/smcc_UCB_gorilla/2/
- Near-Optimal Multi-Agent Learning for Safe Coverage Control/code/safe-multi-agent-coverage/experiments/gorilla/environments/env_6/smcc_UCB_gorilla/2/data.pkl
- Near-Optimal Multi-Agent Learning for Safe Coverage Control/code/safe-multi-agent-coverage/experiments/gorilla/environments/env_6/smcc_UCB_gorilla/4/
- Near-Optimal Multi-Agent Learning for Safe Coverage Control/code/safe-multi-agent-coverage/experiments/gorilla/environments/env_6/smcc_UCB_gorilla/4/data.pkl
- Near-Optimal Multi-Agent Learning for Safe Coverage Control/code/safe-multi-agent-coverage/experiments/gorilla/environments/env_6/smcc_UCB_gorilla/1/
- Near-Optimal Multi-Agent Learning for Safe Coverage Control/code/safe-multi-agent-coverage/experiments/gorilla/environments/env_6/smcc_UCB_gorilla/1/data.pkl
- Near-Optimal Multi-Agent Learning for Safe Coverage Control/code/safe-multi-agent-coverage/experiments/gorilla/environments/env_6/smcc_UCB_gorilla/0/
- Near-Optimal Multi-Agent Learning for Safe Coverage Control/code/safe-multi-agent-coverage/experiments/gorilla/environments/env_6/smcc_UCB_gorilla/0/data.pkl
- Near-Optimal Multi-Agent Learning for Safe Coverage Control/code/safe-multi-agent-coverage/experiments/gorilla/environments/env_6/smcc_MacOpt_gorilla/
- Near-Optimal Multi-Agent Learning for Safe Coverage Control/code/safe-multi-agent-coverage/experiments/gorilla/environments/env_6/smcc_MacOpt_gorilla/data.pkl
- Near-Optimal Multi-Agent Learning for Safe Coverage Control/code/safe-multi-agent-coverage/experiments/gorilla/environments/env_6/smcc_MacOpt_gorilla/params.yaml
- Near-Optimal Multi-Agent Learning for Safe Coverage Control/code/safe-multi-agent-coverage/experiments/gorilla/environments/env_6/smcc_MacOpt_gorilla/0/
- Near-Optimal Multi-Agent Learning for Safe Coverage Control/code/safe-multi-agent-coverage/experiments/gorilla/environments/env_6/smcc_MacOpt_gorilla/0/data.pkl
- Near-Optimal Multi-Agent Learning for Safe Coverage Control/code/safe-multi-agent-coverage/experiments/gorilla/environments/env_6/smcc_MacOpt_gorilla/2/
- Near-Optimal Multi-Agent Learning for Safe Coverage Control/code/safe-multi-agent-coverage/experiments/gorilla/environments/env_6/smcc_MacOpt_gorilla/2/data.pkl
- Near-Optimal Multi-Agent Learning for Safe Coverage Control/code/safe-multi-agent-coverage/experiments/gorilla/environments/env_6/smcc_MacOpt_gorilla/4/
- Near-Optimal Multi-Agent Learning for Safe Coverage Control/code/safe-multi-agent-coverage/experiments/gorilla/environments/env_6/smcc_MacOpt_gorilla/4/data.pkl
- Near-Optimal Multi-Agent Learning for Safe Coverage Control/code/safe-multi-agent-coverage/experiments/gorilla/environments/env_6/smcc_MacOpt_gorilla/1/
- Near-Optimal Multi-Agent Learning for Safe Coverage Control/code/safe-multi-agent-coverage/experiments/gorilla/environments/env_6/smcc_MacOpt_gorilla/1/data.pkl
- Near-Optimal Multi-Agent Learning for Safe Coverage Control/code/safe-multi-agent-coverage/experiments/gorilla/environments/env_6/smcc_MacOpt_gorilla/3/
- Near-Optimal Multi-Agent Learning for Safe Coverage Control/code/safe-multi-agent-coverage/experiments/gorilla/environments/env_6/smcc_MacOpt_gorilla/3/data.pkl
- Near-Optimal Multi-Agent Learning for Safe Coverage Control/code/safe-multi-agent-coverage/experiments/gorilla/environments/env_7/
- Near-Optimal Multi-Agent Learning for Safe Coverage Control/code/safe-multi-agent-coverage/experiments/gorilla/environments/env_7/env.png
- Near-Optimal Multi-Agent Learning for Safe Coverage Control/code/safe-multi-agent-coverage/experiments/gorilla/environments/env_7/env_data.pkl
- Near-Optimal Multi-Agent Learning for Safe Coverage Control/code/safe-multi-agent-coverage/experiments/gorilla/environments/env_7/smcc_MacOpt_gorilla/
- Near-Optimal Multi-Agent Learning for Safe Coverage Control/code/safe-multi-agent-coverage/experiments/gorilla/environments/env_7/smcc_MacOpt_gorilla/data.pkl
- Near-Optimal Multi-Agent Learning for Safe Coverage Control/code/safe-multi-agent-coverage/experiments/gorilla/environments/env_7/smcc_MacOpt_gorilla/params.yaml
- Near-Optimal Multi-Agent Learning for Safe Coverage Control/code/safe-multi-agent-coverage/experiments/gorilla/environments/env_7/smcc_MacOpt_gorilla/4/
- Near-Optimal Multi-Agent Learning for Safe Coverage Control/code/safe-multi-agent-coverage/experiments/gorilla/environments/env_7/smcc_MacOpt_gorilla/4/data.pkl
- Near-Optimal Multi-Agent Learning for Safe Coverage Control/code/safe-multi-agent-coverage/experiments/gorilla/environments/env_7/smcc_MacOpt_gorilla/1/
- Near-Optimal Multi-Agent Learning for Safe Coverage Control/code/safe-multi-agent-coverage/experiments/gorilla/environments/env_7/smcc_MacOpt_gorilla/1/data.pkl
- Near-Optimal Multi-Agent Learning for Safe Coverage Control/code/safe-multi-agent-coverage/experiments/gorilla/environments/env_7/smcc_MacOpt_gorilla/0/
- Near-Optimal Multi-Agent Learning for Safe Coverage Control/code/safe-multi-agent-coverage/experiments/gorilla/environments/env_7/smcc_MacOpt_gorilla/0/data.pkl
- Near-Optimal Multi-Agent Learning for Safe Coverage Control/code/safe-multi-agent-coverage/experiments/gorilla/environments/env_7/smcc_MacOpt_gorilla/2/
- Near-Optimal Multi-Agent Learning for Safe Coverage Control/code/safe-multi-agent-coverage/experiments/gorilla/environments/env_7/smcc_MacOpt_gorilla/2/data.pkl
- Near-Optimal Multi-Agent Learning for Safe Coverage Control/code/safe-multi-agent-coverage/experiments/gorilla/environments/env_7/smcc_MacOpt_gorilla/3/
- Near-Optimal Multi-Agent Learning for Safe Coverage Control/code/safe-multi-agent-coverage/experiments/gorilla/environments/env_7/smcc_MacOpt_gorilla/3/data.pkl
- Near-Optimal Multi-Agent Learning for Safe Coverage Control/code/safe-multi-agent-coverage/experiments/gorilla/environments/env_7/smcc_UCB_gorilla/
- Near-Optimal Multi-Agent Learning for Safe Coverage Control/code/safe-multi-agent-coverage/experiments/gorilla/environments/env_7/smcc_UCB_gorilla/data.pkl
- Near-Optimal Multi-Agent Learning for Safe Coverage Control/code/safe-multi-agent-coverage/experiments/gorilla/environments/env_7/smcc_UCB_gorilla/params.yaml
- Near-Optimal Multi-Agent Learning for Safe Coverage Control/code/safe-multi-agent-coverage/experiments/gorilla/environments/env_7/smcc_UCB_gorilla/1/
- Near-Optimal Multi-Agent Learning for Safe Coverage Control/code/safe-multi-agent-coverage/experiments/gorilla/environments/env_7/smcc_UCB_gorilla/1/data.pkl
- Near-Optimal Multi-Agent Learning for Safe Coverage Control/code/safe-multi-agent-coverage/experiments/gorilla/environments/env_7/smcc_UCB_gorilla/3/
- Near-Optimal Multi-Agent Learning for Safe Coverage Control/code/safe-multi-agent-coverage/experiments/gorilla/environments/env_7/smcc_UCB_gorilla/3/data.pkl
- Near-Optimal Multi-Agent Learning for Safe Coverage Control/code/safe-multi-agent-coverage/experiments/gorilla/environments/env_7/smcc_UCB_gorilla/4/
- Near-Optimal Multi-Agent Learning for Safe Coverage Control/code/safe-multi-agent-coverage/experiments/gorilla/environments/env_7/smcc_UCB_gorilla/4/data.pkl
- Near-Optimal Multi-Agent Learning for Safe Coverage Control/code/safe-multi-agent-coverage/experiments/gorilla/environments/env_7/smcc_UCB_gorilla/0/
- Near-Optimal Multi-Agent Learning for Safe Coverage Control/code/safe-multi-agent-coverage/experiments/gorilla/environments/env_7/smcc_UCB_gorilla/0/data.pkl
[truncated: 2,636 more entries]
