# Supplementary material
Source: ML conference proceedings conference paper supplement (https://proceedings.neurips.cc/paper_files/paper/2022/hash/60dc26558762425a465cb0409fc3dc52-Abstract.html)
Supplement: Supplementary file 1 [file 60dc26558762425a465cb0409fc3dc52-Supplemental-Conference.zip › Near-Optimal Multi-Agent Learning for Safe Coverage Control/code/safe-multi-agent-coverage/apps/bar_chart.py]

import pickle
import matplotlib.pyplot as plt
import numpy as np
from pandas import array
import torch

CUTOFF_SIZE = 855


def RangeInterp(vec, n_samples):
    return torch.from_numpy(np.interp(np.arange(0, n_samples)/(n_samples/vec.shape[0]), np.arange(
        0, vec.shape[0]), vec.reshape(-1).numpy())).reshape(-1, 1)


def RangeInterpnp(vec, n_samples):
    return np.interp(np.arange(0, n_samples)/(n_samples/vec.shape[0]), np.arange(
        0, vec.shape[0]), vec.reshape(-1))


def cat_with(cat_param, vec, size_zero):
    if cat_param == 'nan':
        return torch.cat([vec, torch.nan*torch.ones(size_zero, 1)])
    else:
        return torch.cat([vec, vec[-1]*torch.ones(size_zero, 1)])


def get_regret_of_one_env_one_class_at_each_iter(data_dict):
    opt_val = [data_dict[exp_num]["opt_Fx"]
               for exp_num in data_dict]
    length = len(opt_val)
    if length != 0:
        opt_val_mean = np.sum(opt_val)/length
        traj_list = []
        opt_traj_list = []
        rbar0_traj_list = []
        reco_rbar0_traj_list = []
        rbar_eps_traj_list = []
        max_sigma_list = []
        node_list = []
        cat_param = 'last'
        n_samples_list = []
        for traj in data_dict:
            if torch.mean(data_dict[traj]
                          ['mat_FxIX_rho_opti']) != torch.nan:
                n_samples = data_dict[traj]['samples']['constraint'] + \
                    data_dict[traj]['samples']['density']
                n_samples_list.append(n_samples)
                # n_samples = 240
                size_zero = CUTOFF_SIZE - n_samples
                size_zero2 = CUTOFF_SIZE - \
                    data_dict[traj]['list_sum_max_density_sigma'].shape[0]

                traj_list.append(cat_with(cat_param, RangeInterp(
                    data_dict[traj]['mat_FxIX_rho_opti'], n_samples), size_zero))
                rbar_eps_traj_list.append(cat_with(cat_param, RangeInterp(
                    data_dict[traj]['mat_FxIX_rho_Rbar_eps'], n_samples), size_zero))
                rbar0_traj_list.append(cat_with(cat_param, RangeInterp(
                    data_dict[traj]['mat_FxIX_rho_Rbar0'], n_samples), size_zero))
                reco_rbar0_traj_list.append(cat_with(cat_param, RangeInterp(
                    data_dict[traj]['mat_recommendation_rho_Rbar0'], n_samples), size_zero))
                opt_traj_list.append(cat_with(cat_param, RangeInterp(
                    data_dict[traj]['mat_FtildexIX_rho_opti'], n_samples), size_zero))
                max_sigma_list.append(np.concatenate(
                    [RangeInterpnp(data_dict[traj]['list_sum_max_density_sigma'], n_samples), torch.nan*np.ones(size_zero)]))
                node_list.append(data_dict[traj]['nodes']['diff'])
                normalize_Rbar0 = data_dict[traj]['normalization_factor']['Rbar0']
                normalize_Rbar_eps = data_dict[traj]['normalization_factor']['Rbar_eps']

        mat_FxIX_rho_opti = torch.hstack(
            traj_list).transpose(0, 1)  # shape = len_traj * num_of_traj
        mat_FtildexIX_rho_opti = torch.hstack(
            opt_traj_list).transpose(0, 1)

        mat_of_zero_regret = mat_FtildexIX_rho_opti - mat_FxIX_rho_opti
        mat_of_zero_regret = mat_of_zero_regret/normalize_Rbar0
        mat_of_coverage_Rbareps = torch.hstack(
            rbar_eps_traj_list).transpose(0, 1)/normalize_Rbar_eps
        mat_of_coverage_Rbar0 = torch.hstack(
            rbar0_traj_list).transpose(0, 1)/normalize_Rbar0
        mat_of_coverage_reco_Rbar0 = torch.hstack(
            reco_rbar0_traj_list).transpose(0, 1)/normalize_Rbar0

        max_sigma_mat = np.vstack(max_sigma_list)

        max_sigma_mean = np.nanmean(max_sigma_mat, 0)
        max_sigma_std = np.nanstd(max_sigma_mat, 0)

        mean_regret_for_env_i = torch.nanmean(
            mat_of_zero_regret, 0).reshape(1, -1)
        std_of_regret_due_to_noise_for_env_i = torch.from_numpy(
            np.nanstd(mat_of_zero_regret.numpy(), 0)).reshape(-1, 1)
        return torch.hstack(opt_val).reshape(-1, 1), mat_of_zero_regret, length, mean_regret_for_env_i, std_of_regret_due_to_noise_for_env_i, max_sigma_mean, max_sigma_std, node_list, mat_of_coverage_Rbareps, mat_of_coverage_Rbar0, mat_of_coverage_reco_Rbar0, n_samples_list
    return 0, 0, 0, 0, 0, 0, 0


def get_mean_var(plot_data, class_, Yobject):
    traj_mat = [plot_data[key][class_][Yobject] for key in plot_data]

    traj_mat = torch.vstack(traj_mat)
    if Yobject != 'n_samples_list':
        return torch.mean(traj_mat[:, -1]), torch.var(traj_mat[:, -1])/np.sqrt(traj_mat[:, -1].shape[0]), traj_mat[:, 0]
    else:
        return traj_mat


def get_lowest_start_cover(data):
    return torch.mean(torch.vstack(data).min(0)[0])


def get_norm_factor(data):
    concat_data = torch.cat(data, 1)
    return concat_data.min(1)[0], concat_data.max(1)[0]
    a = 1


def cm2inches(cm):
    return cm/2.54


path = "safe-multi-agent-coverage/pretrained_data/"
data_dir = ["GP", "obstacles",  "gorilla"]
data_name = ["/constraint-GP.pkl", "/constraint-obstacles.pkl",
             "/constraint-gorilla.pkl"]

bar_dict = {}
# Collection of trajectory termination samples and the final coverage value
for dir, name in zip(data_dir, data_name):
    k = open(path + dir + name, "rb")
    all_env_data = pickle.load(k)
    k.close()

    plot_data = {}
    for env in all_env_data:
        print(env)
        if env not in ['i']:
            if float(env[4:]) > -1 and float(env[4:]) < 60:
                plot_data[env] = {}
                for class_ in all_env_data[env]:
                    print(class_)
                    if class_ not in ['smcc_2stage2D1']:
                        plot_data[env][class_] = {}
                        opt_val, traj_list, length, mean, std, sigma_mean, sigma_std, node_list, cov_Rbar_eps, cov_Rbar0, cov_reco_Rbar0, n_samples_list = get_regret_of_one_env_one_class_at_each_iter(
                            all_env_data[env][class_])
                        if length != 0:
                            plot_data[env][class_]['traj_mat'] = traj_list
                            plot_data[env][class_]['traj_env_mean'] = mean
                            plot_data[env][class_]['traj_env_std'] = std
                            plot_data[env][class_]['opt_vec'] = opt_val
                            plot_data[env][class_]['sigma_mean'] = sigma_mean
                            plot_data[env][class_]['sigma_std'] = sigma_std
                            plot_data[env][class_]['nodes'] = torch.Tensor(
                                node_list)
                            plot_data[env][class_]['cov_Rbar_eps'] = cov_Rbar_eps
                            plot_data[env][class_]['cov_Rbar0'] = cov_Rbar0
                            plot_data[env][class_]['cov_reco_Rbar0'] = cov_reco_Rbar0
                            plot_data[env][class_]['n_samples_list'] = torch.Tensor(
                                n_samples_list)
                        else:
                            stop = 1
                        env_included = env
    bar_dict[dir] = {}
    for class_ in plot_data[env_included]:  # assumed same class in all
        bar_dict[dir][class_] = {}
        if class_ == "smcc_PessiMac2D":
            class_mean, class_std_noise, start_val = get_mean_var(
                plot_data, class_, 'cov_reco_Rbar0')
        else:
            class_mean, class_std_noise, start_val = get_mean_var(
                plot_data, class_, 'cov_reco_Rbar0')
        bar_dict[dir][class_]['coverage'] = {}
        bar_dict[dir][class_]['coverage']['mean'] = class_mean
        bar_dict[dir][class_]['coverage']['var'] = class_std_noise
        bar_dict[dir][class_]['coverage']['start_val'] = start_val

        all_data = get_mean_var(
            plot_data, class_, 'n_samples_list')
        bar_dict[dir][class_]['samples'] = {}
        bar_dict[dir][class_]['samples']['data'] = all_data

    # compute normalization factor
    min_vec, max_vec = get_norm_factor([
        bar_dict[dir][class_]['samples']['data'] for class_ in bar_dict[dir]])
    base_cover = get_lowest_start_cover([
        bar_dict[dir][class_]['coverage']['start_val'] for class_ in bar_dict[dir]])

    for class_ in bar_dict[dir]:
        max_minus_vec = (
            bar_dict[dir][class_]['samples']['data'].transpose(1, 0) - min_vec).transpose(1, 0)
        normed_data = torch.divide(max_minus_vec.transpose(
            0, 1), max_vec-min_vec).transpose(0, 1)

        bar_dict[dir][class_]['samples']['mean'] = normed_data.mean()
        bar_dict[dir][class_]['samples']['var'] = normed_data.var(
        )/np.sqrt(normed_data.shape[0]*normed_data.shape[1])
        # bar_dict[dir][class_]['coverage']['mean'] -= base_cover


y = {}
yerr = {}
for key in ['samples', 'coverage']:
    for class_ in bar_dict[dir]:
        y[class_] = []
        yerr[class_] = []
        for env_dir in bar_dict:
            yerr[class_].append(bar_dict[env_dir][class_][key]['var'].item())
            y[class_].append(bar_dict[env_dir][class_][key]['mean'].item())

    f = plt.figure()
    ax = f.axes
    width = 0.25
    x = np.arange(3)
    plt.bar(x-width, y["smcc_SafeMac2D"], width,
            yerr=yerr["smcc_SafeMac2D"],  color='Tab:blue', align='center', alpha=0.7, ecolor='black', capsize=3)
    plt.bar(x, y["smcc_2stage2D"], width,
            yerr=yerr["smcc_SafeMac2D"], color='Tab:orange', align='center', alpha=0.7, ecolor='black', capsize=3)
    plt.bar(x+width, y["smcc_PessiMac2D"], width,
            yerr=yerr["smcc_SafeMac2D"], color='Tab:green', align='center', alpha=0.7, ecolor='black', capsize=3)
    plt.xticks(x, ['GP', 'Obstacles', 'Gorilla'])
    plt.tight_layout(pad=0)
    plt.grid(axis='y')
    # plt.savefig('bar'+key+'.pdf')

    plt.show()
