# Supplementary material
Source: ML conference proceedings conference paper supplement (https://proceedings.neurips.cc/paper_files/paper/2022/hash/60dc26558762425a465cb0409fc3dc52-Abstract.html)
Supplement: Supplementary file 1 [file 60dc26558762425a465cb0409fc3dc52-Supplemental-Conference.zip › Near-Optimal Multi-Agent Learning for Safe Coverage Control/code/safe-multi-agent-coverage/apps/consolidate_data.py]

import pickle
import matplotlib.pyplot as plt
import numpy as np
import torch
import os

workspace = "safe-multi-agent-coverage"
path = workspace + "/experiments/gorilla/environments"

env_folders = [f.name for f in os.scandir(path) if f.is_dir()]

all_data = {}
all_env_data = {}
for env in env_folders:
    all_env_data[env] = {}
    path_env_i = path + '/' + env
    class_folders = [f.name for f in os.scandir(path_env_i) if f.is_dir()]
    for class_ in class_folders:
        all_env_data[env][class_] = {}
        path_class = path_env_i + '/' + class_
        experiments_folders = [f.name for f in os.scandir(
            path_class) if f.is_dir()]
        for exp_num in experiments_folders:
            data_path = path_class + '/' + exp_num + "/data.pkl"
            if os.path.exists(data_path):
                if os.path.getsize(data_path) != 0:
                    k = open(data_path, "rb")
                    data = pickle.load(k)
                    k.close()
                    all_env_data[env][class_][exp_num] = data
        print(env, " ", class_, " ", len(experiments_folders), "done")

a_file = open(path + "/50_env_data.pkl", "wb")
pickle.dump(all_env_data, a_file)
a_file.close()
