# Supplementary material
Source: ML conference proceedings conference paper supplement (https://proceedings.neurips.cc/paper_files/paper/2022/hash/60dc26558762425a465cb0409fc3dc52-Abstract.html)
Supplement: Supplementary file 1 [file 60dc26558762425a465cb0409fc3dc52-Supplemental-Conference.zip › Near-Optimal Multi-Agent Learning for Safe Coverage Control/code/safe-multi-agent-coverage/apps/plotting_script.py]

import pickle
import matplotlib.pyplot as plt
import numpy as np
from pandas import array
import torch

# path = "safe-multi-agent-coverage/pretrained_data/GP"
# k = open(path + "/constraint-GP.pkl", "rb")
# filename = 'safemac-gp'
# CUTOFF_SIZE = 550

path = "safe-multi-agent-coverage/pretrained_data/gorilla"
k = open(path + "/constraint-gorilla.pkl", "rb")
filename = 'safemac-gorilla'
CUTOFF_SIZE = 750

# path = "safe-multi-agent-coverage/pretrained_data/obstacles"
# k = open(path + "/constraint-obstacles.pkl", "rb")
# filename = 'safemac-obstacles'
# CUTOFF_SIZE = 800

# path = "safe-multi-agent-coverage/pretrained_data/gorilla"
# k = open(path + "/unconstraint-gorilla.pkl", "rb")
# name = 'macopt-gorilla'
# CUTOFF_SIZE = 200


# path = "safe-multi-agent-coverage/pretrained_data/GP"
# k = open(path + "/unconstraint-GP.pkl", "rb")
# name = 'macopt-gp'
# CUTOFF_SIZE = 200


def set_label(label):
    if label == 'smcc_SafeMac2D':
        return 'SafeMac'
    elif label == 'smcc_2stage2D':
        return 'Two-Stage'
    elif label == 'smcc_PessiMac2D':
        return 'PassiveMac'
    elif label == 'smcc_MacOpt2D':
        return 'MacOpt'
    elif label == 'smcc_DiskCenter2D':
        return 'UCB'


def RangeInterp(vec, n_samples):
    return torch.from_numpy(np.interp(np.arange(0, n_samples)/(n_samples/vec.shape[0]), np.arange(
        0, vec.shape[0]), vec.reshape(-1).numpy())).reshape(-1, 1)


def RangeInterpnp(vec, n_samples):
    return np.interp(np.arange(0, n_samples)/(n_samples/vec.shape[0]), np.arange(
        0, vec.shape[0]), vec.reshape(-1))


def cat_with(cat_param, vec, size_zero):
    if cat_param == 'nan':
        return torch.cat([vec, torch.nan*torch.ones(size_zero, 1)])
    else:
        return torch.cat([vec, vec[-1]*torch.ones(size_zero, 1)])


def get_regret_of_one_env_one_class_at_each_iter(data_dict):
    opt_val = [data_dict[exp_num]["opt_Fx"]
               for exp_num in data_dict]
    length = len(opt_val)
    if length != 0:
        opt_val_mean = np.sum(opt_val)/length
        traj_list = []
        opt_traj_list = []
        rbar0_traj_list = []
        reco_rbar0_traj_list = []
        rbar_eps_traj_list = []
        max_sigma_list = []
        node_list = []
        cat_param = 'last'
        for traj in data_dict:
            if torch.mean(data_dict[traj]
                          ['mat_FxIX_rho_opti']) != torch.nan:
                n_samples = data_dict[traj]['samples']['constraint'] + \
                    data_dict[traj]['samples']['density']
                size_zero = CUTOFF_SIZE - n_samples
                size_zero2 = CUTOFF_SIZE - \
                    data_dict[traj]['list_sum_max_density_sigma'].shape[0]

                traj_list.append(cat_with(cat_param, RangeInterp(
                    data_dict[traj]['mat_FxIX_rho_opti'], n_samples), size_zero))
                rbar_eps_traj_list.append(cat_with(cat_param, RangeInterp(
                    data_dict[traj]['mat_FxIX_rho_Rbar_eps'], n_samples), size_zero))
                rbar0_traj_list.append(cat_with(cat_param, RangeInterp(
                    data_dict[traj]['mat_FxIX_rho_Rbar0'], n_samples), size_zero))
                reco_rbar0_traj_list.append(cat_with(cat_param, RangeInterp(
                    data_dict[traj]['mat_recommendation_rho_Rbar0'], n_samples), size_zero))
                opt_traj_list.append(cat_with(cat_param, RangeInterp(
                    data_dict[traj]['mat_FtildexIX_rho_opti'], n_samples), size_zero))
                max_sigma_list.append(np.concatenate(
                    [RangeInterpnp(data_dict[traj]['list_sum_max_density_sigma'], n_samples), torch.nan*np.ones(size_zero)]))
                node_list.append(data_dict[traj]['nodes']['diff'])
                normalize_Rbar0 = data_dict[traj]['normalization_factor']['Rbar0']
                normalize_Rbar_eps = data_dict[traj]['normalization_factor']['Rbar_eps']

        mat_FxIX_rho_opti = torch.hstack(
            traj_list).transpose(0, 1)  # shape = len_traj * num_of_traj
        mat_FtildexIX_rho_opti = torch.hstack(
            opt_traj_list).transpose(0, 1)  # shape = len_traj * num_of_traj
        mat_of_zero_regret = mat_FtildexIX_rho_opti - mat_FxIX_rho_opti  #
        mat_of_zero_regret = mat_of_zero_regret/normalize_Rbar0
        mat_of_coverage_Rbareps = torch.hstack(
            rbar_eps_traj_list).transpose(0, 1)/normalize_Rbar_eps
        mat_of_coverage_Rbar0 = torch.hstack(
            rbar0_traj_list).transpose(0, 1)/normalize_Rbar0
        mat_of_coverage_reco_Rbar0 = torch.hstack(
            reco_rbar0_traj_list).transpose(0, 1)/normalize_Rbar0

        max_sigma_mat = np.vstack(max_sigma_list)
        max_sigma_mean = np.nanmean(max_sigma_mat, 0)
        max_sigma_std = np.nanstd(max_sigma_mat, 0)
        mean_regret_for_env_i = torch.nanmean(
            mat_of_zero_regret, 0).reshape(1, -1)
        std_of_regret_due_to_noise_for_env_i = torch.from_numpy(
            np.nanstd(mat_of_zero_regret.numpy(), 0)).reshape(-1, 1)
        return torch.hstack(opt_val).reshape(-1, 1), mat_of_zero_regret, length, mean_regret_for_env_i, std_of_regret_due_to_noise_for_env_i, max_sigma_mean, max_sigma_std, node_list, mat_of_coverage_Rbareps, mat_of_coverage_Rbar0, mat_of_coverage_reco_Rbar0
    return 0, 0, 0, 0, 0, 0, 0


def plotter(plot_data, class_):

    traj_mat = [plot_data[key][class_]['traj_mat'] for key in plot_data]
    traj_env_mean = [plot_data[key][class_]['traj_env_mean']
                     for key in plot_data]
    traj_env_std = [plot_data[key][class_]['traj_env_std']
                    for key in plot_data]
    opt_vec = [plot_data[key][class_]['opt_vec'] for key in plot_data]

    opt_vec = torch.vstack(opt_vec)
    traj_mat = torch.vstack(traj_mat)
    traj_env_mean = torch.vstack(traj_env_mean)
    traj_env_std = torch.vstack(traj_env_std)
    sample_size = traj_mat.shape[0]

    class_mean = torch.nanmean(traj_mat, 0)
    class_std = torch.std(traj_mat, 0)/np.sqrt(traj_mat.shape[0])
    class_std_env = torch.std(traj_env_mean, 0) / \
        np.sqrt(traj_env_mean.shape[0])
    class_std_noise = torch.nanmean(traj_env_std, 0) / np.sqrt(sample_size)
    return class_mean, class_std_noise


def plotter_traj(plot_data, class_, Yobject):
    traj_mat = [plot_data[key][class_][Yobject] for key in plot_data]

    traj_mat = torch.vstack(traj_mat)
    sample_size = traj_mat.shape[0]
    class_mean = torch.nanmean(traj_mat, 0)
    class_std_noise = torch.from_numpy(
        np.nanstd(traj_mat.numpy(), 0)).reshape(-1) / np.sqrt(sample_size)
    return class_mean, class_std_noise


def plotter_sigma(plot_data, class_):
    sigma_mean = [plot_data[key][class_]['sigma_mean']
                  for key in plot_data]
    sigma_std = [plot_data[key][class_]['sigma_std']
                 for key in plot_data]

    sigma_mean = np.vstack(sigma_mean)
    sigma_std = np.vstack(sigma_std)

    class_mean = np.nanmean(sigma_mean, 0)
    class_std = np.nanstd(sigma_std, 0) / \
        np.sqrt(sigma_std.shape[0])
    return class_mean, class_std


all_env_data = pickle.load(k)
k.close()
counter = 0
plot_data = {}
for env in all_env_data:
    print(env)
    if env not in ['i']:
        if float(env[4:]) > -1 and float(env[4:]) < 60:
            plot_data[env] = {}
            for class_ in all_env_data[env]:
                print(class_)
                if class_ not in ['smcc_2stage2D1']:
                    plot_data[env][class_] = {}
                    opt_val, traj_list, length, mean, std, sigma_mean, sigma_std, node_list, cov_Rbar_eps, cov_Rbar0, cov_reco_Rbar0 = get_regret_of_one_env_one_class_at_each_iter(
                        all_env_data[env][class_])
                    if length != 0:
                        plot_data[env][class_]['traj_mat'] = traj_list
                        plot_data[env][class_]['traj_env_mean'] = mean
                        plot_data[env][class_]['traj_env_std'] = std
                        plot_data[env][class_]['opt_vec'] = opt_val
                        plot_data[env][class_]['sigma_mean'] = sigma_mean
                        plot_data[env][class_]['sigma_std'] = sigma_std
                        plot_data[env][class_]['nodes'] = torch.Tensor(
                            node_list)
                        plot_data[env][class_]['cov_Rbar_eps'] = cov_Rbar_eps
                        plot_data[env][class_]['cov_Rbar0'] = cov_Rbar0
                        plot_data[env][class_]['cov_reco_Rbar0'] = cov_reco_Rbar0
                    else:
                        stop = 1
                    env_included = env

f = plt.figure()
ax = f.axes
for class_ in plot_data[env_included]:  # assumed same class in all
    class_mean, class_std_noise = plotter_traj(
        plot_data, class_, 'cov_reco_Rbar0')
    plt.fill_between(np.arange(class_mean.shape[0]), y1=class_mean - class_std_noise,
                     y2=class_mean+class_std_noise, alpha=0.3)
    plt.plot(np.arange(class_mean.shape[0]),
             class_mean, label=set_label(class_))

plt.legend()
plt.xlabel("Samples")
plt.ylabel(r'$F(X_T; \rho, \bar{R}_{0}(X_0)$')
plt.tight_layout(pad=0)
plt.grid(axis='y')
# plt.savefig(filename+'.pdf')
plt.show()


sub_opt = 0
f, ax = plt.subplots()
for class_ in plot_data[env_included]:  # assumed same class in all
    class_mean, class_std_noise = plotter(plot_data, class_)
    ax.errorbar(np.arange(class_mean.shape[0]),
                class_mean, yerr=class_std_noise, label=set_label(class_))
    plt.plot(torch.cumsum(class_mean, dim=0) /
             (1+np.arange(class_mean.shape[0])), label=set_label(class_)+'-CR/T')

ax.legend(prop={"size": 16})
ax.set_title("Disk Coverage")
ax.set_xlabel("samples")
ax.set_ylabel("Regret")
ax.xaxis.label.set_fontsize(22)
ax.yaxis.label.set_fontsize(22)
ax.title.set_fontsize(22)
plt.grid(True)
plt.show()

# 3
f, ax = plt.subplots()
for class_ in plot_data[env_included]:  # assumed same class in all
    class_mean, class_std_noise = plotter_traj(
        plot_data, class_, 'cov_Rbar0')
    ax.errorbar(np.arange(class_mean.shape[0]),
                class_mean, yerr=class_std_noise, label=set_label(class_))


ax.legend(prop={"size": 16})
ax.set_title("Disk Coverage")
ax.set_xlabel("Samples")
ax.set_ylabel("cov_Rbar0")
ax.xaxis.label.set_fontsize(22)
ax.yaxis.label.set_fontsize(22)
ax.title.set_fontsize(22)
plt.grid(True)
plt.show()

f, ax = plt.subplots()
for class_ in plot_data[env_included]:  # assumed same class in all
    class_mean, class_std_noise = plotter_traj(
        plot_data, class_, 'cov_reco_Rbar0')
    ax.errorbar(np.arange(class_mean.shape[0]),
                class_mean, yerr=class_std_noise, label=set_label(class_))

ax.legend(prop={"size": 16})
ax.set_title("Disk Coverage")
ax.set_xlabel("Samples")
ax.set_ylabel("Safe Recommendation")
ax.xaxis.label.set_fontsize(22)
ax.yaxis.label.set_fontsize(22)
ax.title.set_fontsize(22)
plt.grid(True)
plt.show()

f, ax = plt.subplots()
for class_ in plot_data[env_included]:  # assumed same class in all
    class_mean, class_std_noise = plotter_sigma(plot_data, class_)
    ax.errorbar(np.arange(class_mean.shape[0]),
                class_mean, yerr=class_std_noise, label=set_label(class_))

ax.legend(prop={"size": 16})
ax.set_title("Disk Coverage")
ax.set_xlabel("iterations")
ax.set_ylabel(r'$w_t$')
ax.xaxis.label.set_fontsize(22)
ax.yaxis.label.set_fontsize(22)
ax.title.set_fontsize(22)
plt.grid(True)
plt.show()
