# Supplementary material
Source: ML conference proceedings conference paper supplement (https://proceedings.neurips.cc/paper_files/paper/2022/hash/60dc26558762425a465cb0409fc3dc52-Abstract.html)
Supplement: Supplementary file 1 [file 60dc26558762425a465cb0409fc3dc52-Supplemental-Conference.zip › Near-Optimal Multi-Agent Learning for Safe Coverage Control/code/safe-multi-agent-coverage/main.py]

# The environment for this file is a ~/work/rl
from utils.environement import GridWorld
from utils.visu import Visu
import errno
import torch
import os
import argparse
import matplotlib.pyplot as plt

import yaml
from utils.helper import TrainAndUpdateDensity, TrainAndUpdateConstraint, get_optimistic_intersection, SafelyExplore, UpdateSafeVisu, UpdateCoverageVisu, get_frame_writer, save_data_plots, submodular_optimization, idxfromloc, get_pessimistic_union
from utils.initializer import get_players_initialized
import warnings
import pickle
from utils.ground_truth import GroundTruth

warnings.filterwarnings('ignore')
plt.rcParams['figure.figsize'] = [12, 6]

workspace = "safe-multi-agent-coverage"

parser = argparse.ArgumentParser(description='A foo that bars')
parser.add_argument('-param', default="smcc_MacOpt_gorilla")  # params

parser.add_argument('-env', type=int, default=1)
parser.add_argument('-i', type=int, default=0)
args = parser.parse_args()

# 1) Load the config file
with open(workspace + "/params/" + args.param + ".yaml") as file:
    params = yaml.load(file, Loader=yaml.FullLoader)
print(params)

# 2) Set the path and copy params from file
# exp_name = params["experiment"]["name"]
# env_load_path = workspace + "/experiments/" + datetime.today().strftime('%d-%m-%y') + \
#     datetime.today().strftime('-%A')[0:4] + \
#     "/environments/env_" + str(args.env) + "/"
env_load_path = workspace + \
    "/experiments/gorilla/environments/env_" + \
    str(args.env) + "/"
# env_load_path = workspace + "/experiments/" + "01-02-22-Tue"
save_path = env_load_path + "/" + args.param + "/"

if not os.path.exists(save_path):
    try:
        os.makedirs(save_path)
    except OSError as e:
        if e.errno != errno.EEXIST:
            raise

# 3) Setup the environement
env = GridWorld(
    env_params=params["env"], common_params=params["common"], env_dir=env_load_path)

grid_V = env.grid_V
# If optimistic set is intersection of 2 common graph, then they take a joint step (solve greedy algorithm combined)
# If pessimistic set is combined, new pessimistic set is union of sets, and agent can travel in union
init_safe = env.get_safe_init()
print("initialized location", init_safe)

opt = GroundTruth(env, params)

opt.compute_optimal_location_by_expansion()
opt.compute_normalization_factor()
# opt_goal, opt_val, true_associate_dict, optimal_feasible_boundary, optimal_graphs = compute_optimal_location_by_expansion(
#     true_density, true_constraint_function, init_safe, params, grid_V, env.env_data)
# print("goal", opt_goal)

traj_data_dict = {}
for traj_iter in range(params["algo"]["n_CI_samples"]):
    print(args)
    if args.i != -1:
        traj_iter = args.i

    if not os.path.exists(save_path + str(traj_iter)):
        os.makedirs(save_path + str(traj_iter))

    list_FxIX_rho_opti = []
    list_FtildexIX_rho_opti = []
    list_FxlIX_lcb_pessi = []
    list_FxlIX_pessi_rho_Rbar0 = []
    list_FxIX_rho_Rbar_eps = []
    list_FxIX_rho_Rbar0 = []
    list_FxIX_lcb_pessi = []
    exploit_record = []

    # Start from some safe initial states
    train = {}
    train["Cx_X"] = init_safe["loc"]
    train["Fx_X"] = init_safe["loc"]
    train["Cx_Y"] = env.get_multi_constraint_observation(train["Cx_X"])
    train["Fx_Y"] = env.get_multi_density_observation(train["Fx_X"])
    players = get_players_initialized(train, params, grid_V)

    safe_boundary = train["Cx_X"]
    fig, ax = plt.subplots()
    visu = Visu(f_handle=fig, constraint=params["common"]["constraint"], grid_V=grid_V, safe_boundary=train["Cx_X"],
                true_constraint_function=opt.true_constraint_function, true_objective_func=opt.true_density, opt_goal=opt.opt_goal, optimal_feasible_boundary=opt.optimal_feasible_boundary, agent_param=params["agent"], env_params=params["env"], common_params=params["common"])

    # visu.plot_optimal_point()
    # Associate safe nodes in the graph and also unsafe

    for it, player in enumerate(players):
        player.update_Cx_gp_with_current_data()
        player.update_Fx_gp_with_current_data()
        player.update_graph(init_safe["idx"][it])
        player.save_posterior_normalization_const()
        player.update_current_location(init_safe["loc"][it])

    associate_dict = {}
    associate_dict[0] = []
    for idx in range(params["env"]["n_players"]):
        associate_dict[0].append(idx)

    writer = get_frame_writer()
    iter = -1
    list_sum_max_density_sigma = []
    max_density_sigma = params["env"]["n_players"] * \
        players[0].posterior_normalization_const
    list_sum_max_density_sigma.append(
        max_density_sigma)
    pt0 = None
    pt1 = None

    # 2) Solve the submodular problem and get a next point to go xi* in pessimistic safe set
    associate_dict, pessi_associate_dict, acq_density, M_dist = submodular_optimization(
        players, init_safe, params)
    if params["experiment"]["generate_regret_plot"]:
        if params["agent"]["sol_domain"] == "pessi":
            FxIX_rho_opti = opt.compute_cover_xIX_rho_opti(
                players, pessi_associate_dict)
            FtildexIX_rho_opti = opt.compute_cover_tildexIX_rho_opti(
                players, pessi_associate_dict)
        else:
            FxIX_rho_opti = opt.compute_cover_xIX_rho_opti(
                players, associate_dict)
            FtildexIX_rho_opti = opt.compute_cover_tildexIX_rho_opti(
                players, associate_dict)
        FxlIX_pessi_rho_Rbar0, FxlIX_lcb_pessi = opt.compute_cover_xlIX_rho_pessi(
            players, pessi_associate_dict)
        FxIX_lcb_pessi = opt.compute_cover_xIX_lcb_pessi(players)
        FxIX_rho_Rbar_eps = opt.compute_cover_xIX_rho_Rbar(players, 'eps')
        FxIX_rho_Rbar0 = opt.compute_cover_xIX_rho_Rbar(players, '0')
        list_FxIX_rho_opti.append(FxIX_rho_opti)
        list_FtildexIX_rho_opti.append(FtildexIX_rho_opti)
        list_FxlIX_lcb_pessi.append(FxlIX_lcb_pessi)
        list_FxlIX_pessi_rho_Rbar0.append(FxlIX_pessi_rho_Rbar0)
        list_FxIX_lcb_pessi.append(FxIX_lcb_pessi)
        list_FxIX_rho_Rbar_eps.append(FxIX_rho_Rbar_eps)
        list_FxIX_rho_Rbar0.append(FxIX_rho_Rbar0)
    max_density_sigma = sum(
        [player.max_density_sigma for player in players])
    list_sum_max_density_sigma.append(
        max_density_sigma)
    print(iter, max_density_sigma)

    # max_density_sigma = sum(
    #     [player.max_density_sigma for player in players])
    # list_sum_max_density_sigma.append(max_density_sigma)
    # print(iter, max_density_sigma)
    bool_SafeUncertainPt = torch.ones(params["env"]["n_players"]) < 0
    goose_step = 0
    TwoStageRun = False
    with writer.saving(fig, save_path + str(traj_iter) + "/video.mp4", dpi=200):
        visu.UpdateIter(iter, -1)
        for agent_key, player in enumerate(players):
            pt1 = UpdateCoverageVisu(agent_key, players, visu, env,
                                     acq_density, M_dist, writer, fig, pt1)
        while (max_density_sigma > params["algo"]["eps_density_thresh"] or torch.any(bool_SafeUncertainPt) or TwoStageRun) and iter < params["algo"]["n_iter"]:
            if max_density_sigma <= params["algo"]["eps_density_thresh"]:
                # change gaol to most uncertain point
                for agent_key in torch.arange(params["env"]["n_players"])[bool_SafeUncertainPt].tolist():
                    players[agent_key].update_next_to_go_loc(
                        players[agent_key].max_constraint_sigma_goal)
                # 3) Apply GoOSE for safe exploration till that location
                # Loops over each player
            if params["agent"]["use_goose"]:
                bool_IsGoalSafe = torch.ones(params["env"]["n_players"]) < 0
                bool_CannotReach = torch.ones(params["env"]["n_players"]) < 0
                for agent_key in range(params["env"]["n_players"]):
                    Xg_idx = idxfromloc(
                        env.grid_V, players[agent_key].get_next_to_go_loc())
                    if Xg_idx in players[agent_key].pessimistic_graph.nodes:
                        bool_IsGoalSafe[agent_key] = True
                    elif Xg_idx not in players[agent_key].union_graph.nodes:
                        bool_CannotReach[agent_key] = True
                # even if one cannot reach we need to recompute
                GraphChanged = torch.ones(
                    params["env"]["n_players"]) < 0
                if not torch.any(bool_CannotReach) and not torch.all(bool_IsGoalSafe):
                    iter += 1
                    goose_step += 1
                    visu.UpdateIter(iter, goose_step)
                    print("In goose, iter ", iter, " Goose step", goose_step)
                    pre_graph = [set(player.optimistic_graph.nodes)
                                 for player in players]

                    players, associate_dict, pessi_associate_dict, pt0 = SafelyExplore(
                        players, params, associate_dict, pessi_associate_dict, iter,
                        visu, init_safe, env, writer, fig, pt0, bool_IsGoalSafe)

                    for player, safe in zip(players, init_safe["idx"]):
                        player.update_Cx_gp_with_current_data()
                        if params["agent"]["use_goose"]:
                            player.update_graph(safe)
                    post_graph = [set(player.optimistic_graph.nodes)
                                  for player in players]
                    # Check optimistic graph change
                    for key in range(params["env"]["n_players"]):
                        GraphChanged[key] = (len(
                            pre_graph[key] - post_graph[key]) != 0)
                    if torch.any(GraphChanged):
                        associate_dict, pessi_associate_dict, acq_density, M_dist = submodular_optimization(
                            players, init_safe, params)
                        for agent_key, player in enumerate(players):
                            pt1 = UpdateCoverageVisu(agent_key, players, visu, env,
                                                     acq_density, M_dist, writer, fig, pt1)
                    max_density_sigma = sum(
                        [player.max_density_sigma for player in players])
                    list_sum_max_density_sigma.append(
                        max_density_sigma)
                    print(iter, max_density_sigma)
                    if params["experiment"]["generate_regret_plot"]:
                        FxIX_rho_Rbar_eps = opt.compute_cover_xIX_rho_Rbar(
                            players, 'eps')
                        FxIX_rho_Rbar0 = opt.compute_cover_xIX_rho_Rbar(
                            players, '0')
                        FxIX_rho_opti = opt.compute_cover_xIX_rho_opti(
                            players, associate_dict)
                        # TODO: change from true asso to opti asso.
                        # FtildexIX_rho_opti = opt.compute_opt_Fx_at_t(players)
                        FtildexIX_rho_opti = opt.compute_cover_tildexIX_rho_opti(
                            players, associate_dict)
                        FxlIX_pessi_rho_Rbar0, FxlIX_lcb_pessi = opt.compute_cover_xlIX_rho_pessi(
                            players, pessi_associate_dict)
                        FxIX_lcb_pessi = opt.compute_cover_xIX_lcb_pessi(
                            players)
                        list_FxIX_rho_opti.append(FxIX_rho_opti)
                        list_FtildexIX_rho_opti.append(FtildexIX_rho_opti)
                        list_FxlIX_lcb_pessi.append(FxlIX_lcb_pessi)
                        list_FxlIX_pessi_rho_Rbar0.append(
                            FxlIX_pessi_rho_Rbar0)
                        list_FxIX_lcb_pessi.append(FxIX_lcb_pessi)
                        list_FxIX_rho_Rbar_eps.append(FxIX_rho_Rbar_eps)
                        list_FxIX_rho_Rbar0.append(FxIX_rho_Rbar0)
                if torch.any(bool_CannotReach):
                    associate_dict, pessi_associate_dict, acq_density, M_dist = submodular_optimization(
                        players, init_safe, params)
                    for agent_key, player in enumerate(players):
                        pt1 = UpdateCoverageVisu(agent_key, players, visu, env,
                                                 acq_density, M_dist, writer, fig, pt1)
                    # max_density_sigma = sum(
                    #     [player.max_density_sigma for player in players])
                    # list_sum_max_density_sigma.append(
                    #     max_density_sigma)
                    # print(iter, max_density_sigma)
            else:
                visu.UpdateIter(iter, -1)
                for agent_key in range(params["env"]["n_players"]):
                    xi_star = players[agent_key].get_next_to_go_loc()
                    players[agent_key].update_current_location(xi_star)

            if params["agent"]["Two_stage"] and params["agent"]["use_goose"]:
                visu.UpdateIter(iter, goose_step)
                for agent_key, player in enumerate(players):
                    pt0 = UpdateSafeVisu(agent_key, players, visu,
                                         env,  writer, associate_dict, pessi_associate_dict, fig, pt0)

            # check if all the agents are able to reach to the desired location
            list_IsGoalSafe = [idxfromloc(env.grid_V, players[agent_key].get_next_to_go_loc()) in players[agent_key].pessimistic_graph.nodes for agent_key in range(
                params["env"]["n_players"])]
            if (torch.all(torch.BoolTensor(list_IsGoalSafe)) or not params["agent"]["use_goose"] or goose_step == params["algo"]["goose_steps"]) and max_density_sigma > params["algo"]["eps_density_thresh"]:
                goose_step = 0
                iter += 1
                visu.UpdateIter(iter, -2)
                for agent_key in range(params["env"]["n_players"]):
                    # collection of density once goose let us reach
                    if list_IsGoalSafe[agent_key] or not params["agent"]["use_goose"]:
                        reached_pt = players[agent_key].get_next_to_go_loc()
                        players[agent_key].update_current_location(reached_pt)
                    else:  # this is executed only if we did not collect any density measurement since long
                        reached_pt = players[agent_key].current_location
                    TrainAndUpdateDensity(
                        reached_pt, agent_key, players, params, env)
                    if params["agent"]["sol_domain"] == "pessi":
                        # 3.1) Train and update after reaching the location
                        TrainAndUpdateConstraint(
                            reached_pt, agent_key, players, params, env)

                        # 3.2) Update GP's of all the agents, has an effect on visu only
                        for player, safe in zip(players, init_safe["idx"]):
                            player.update_Cx_gp_with_current_data()

                        print("xn reached point", reached_pt)
                        # TODO: Think if it make sense to update all agents all sets with the data already communicated
                        # 3.3) Update Visualization
                        pt0 = UpdateSafeVisu(agent_key, players, visu,
                                             env,  writer, associate_dict, pessi_associate_dict, fig, pt0)

                for agent_key, player in enumerate(players):
                    player.update_Fx_gp_with_current_data()

                associate_dict, pessi_associate_dict, acq_density, M_dist = submodular_optimization(
                    players, init_safe, params)
                for agent_key, player in enumerate(players):
                    pt1 = UpdateCoverageVisu(agent_key, players, visu, env,
                                             acq_density, M_dist, writer, fig, pt1)
                max_density_sigma = sum(
                    [player.max_density_sigma for player in players])
                list_sum_max_density_sigma.append(max_density_sigma)
                print(iter, max_density_sigma)

                if params["experiment"]["generate_regret_plot"]:
                    FxIX_rho_Rbar_eps = opt.compute_cover_xIX_rho_Rbar(
                        players, 'eps')
                    FxIX_rho_Rbar0 = opt.compute_cover_xIX_rho_Rbar(
                        players, '0')
                    FxIX_rho_opti = opt.compute_cover_xIX_rho_opti(
                        players, associate_dict)
                    # TODO: change from true asso to opti asso.
                    # FtildexIX_rho_opti = opt.compute_opt_Fx_at_t(players)
                    FtildexIX_rho_opti = opt.compute_cover_tildexIX_rho_opti(
                        players, associate_dict)
                    FxlIX_pessi_rho_Rbar0, FxlIX_lcb_pessi = opt.compute_cover_xlIX_rho_pessi(
                        players, pessi_associate_dict)
                    FxIX_lcb_pessi = opt.compute_cover_xIX_lcb_pessi(players)
                    list_FxIX_rho_opti.append(FxIX_rho_opti)
                    list_FtildexIX_rho_opti.append(FtildexIX_rho_opti)
                    list_FxlIX_lcb_pessi.append(FxlIX_lcb_pessi)
                    list_FxIX_lcb_pessi.append(FxIX_lcb_pessi)
                    list_FxlIX_pessi_rho_Rbar0.append(
                        FxlIX_pessi_rho_Rbar0)
                    list_FxIX_rho_Rbar_eps.append(FxIX_rho_Rbar_eps)
                    list_FxIX_rho_Rbar0.append(FxIX_rho_Rbar0)

            # check if discs have any uncertain safe point below them
            bool_SafeUncertainPt = torch.ones(params["env"]["n_players"]) < 0
            if params["agent"]["use_goose"] and max_density_sigma < params["algo"]["eps_density_thresh"] and not params["agent"]["Two_stage"]:
                for agent_key in range(params["env"]["n_players"]):
                    SafeUncertainInDisk = set.intersection(set(players[agent_key].full_disc_nodes), (
                        set(players[agent_key].optimistic_graph.nodes) - set(players[agent_key].pessimistic_graph.nodes)))
                    # SafeUncertainInDisk = set(players[agent_key].full_disc_nodes) - (
                    #     set(players[agent_key].optimistic_graph.nodes) - set(players[agent_key].pessimistic_graph.nodes))
                    if len(SafeUncertainInDisk) != 0:
                        bool_SafeUncertainPt[agent_key] = True
                        players[agent_key].set_goal_max_constraint_sigma_under_disc(
                            list(SafeUncertainInDisk))

            TwoStageRun = False
            if params["agent"]["Two_stage"]:
                fully_explored = torch.ones(params["env"]["n_players"]) < 0
                for agent_key in range(params["env"]["n_players"]):
                    fully_explored[agent_key] = len(list(set(
                        players[agent_key].optimistic_graph.nodes) - set(players[agent_key].pessimistic_graph.nodes))) == 0
                # True if not fully explored
                TwoStageRun = not torch.all(fully_explored)

        # Plot the final location after you have converged
        for agent_key, player in enumerate(players):
            player.update_current_location(player.planned_disk_center)
            player.update_next_to_go_loc(player.planned_disk_center)
            if params["agent"]["use_goose"]:
                pt0 = UpdateSafeVisu(agent_key, players, visu,
                                     env, writer, associate_dict, pessi_associate_dict, fig, pt0)
            pt1 = UpdateCoverageVisu(agent_key, players, visu, env,
                                     acq_density, M_dist, writer, fig, pt1)

    plt.close()  # close the plt so that next video doesn't get affected
    nodes = {}
    nodes['pessi'] = 0
    nodes['opti'] = 0
    nodes['diff'] = 0
    for batch_key in associate_dict:
        nodes['pessi'] += len(set(players[batch_key].pessimistic_graph.nodes))
        nodes['opti'] += len(set(players[batch_key].optimistic_graph.nodes))
        nodes['diff'] += len(set(players[batch_key].optimistic_graph.nodes) -
                             set(players[batch_key].pessimistic_graph.nodes))
    print("nodes", nodes)
    samples = {}
    samples['constraint'] = players[0].Cx_X_train.shape[0]
    samples['density'] = players[0].Fx_X_train.shape[0]
    print("measurements", samples)
    normalization_factor = {}
    normalization_factor['Rbar0'] = opt.normalization_Rbar0
    normalization_factor['Rbar_eps'] = opt.normalization_Rbar_eps
    if params["experiment"]["generate_regret_plot"]:
        traj_data_dict[traj_iter] = save_data_plots(list_FxIX_rho_opti, list_FtildexIX_rho_opti, list_FxIX_lcb_pessi, list_FxlIX_lcb_pessi, list_FxlIX_pessi_rho_Rbar0, list_sum_max_density_sigma, list_FxIX_rho_Rbar_eps, list_FxIX_rho_Rbar0,
                                                    opt.opt_val, exploit_record, nodes, samples, normalization_factor, save_path + str(traj_iter))
        a_file = open(save_path + "data.pkl", "wb")
        pickle.dump(traj_data_dict, a_file)
        a_file.close()

os.system('cp ' + workspace + '/params/' + args.param +
          '.yaml ' + save_path + 'params.yaml')
