# Supplementary material
Source: ML conference proceedings conference paper supplement (https://proceedings.neurips.cc/paper_files/paper/2022/hash/60dc26558762425a465cb0409fc3dc52-Abstract.html)
Supplement: Supplementary file 1 [file 60dc26558762425a465cb0409fc3dc52-Supplemental-Conference.zip › Near-Optimal Multi-Agent Learning for Safe Coverage Control/code/safe-multi-agent-coverage/params/smcc_MacOpt_gorilla.yaml]

env:
  start: -2
  step_size: 0.1
  shape:
    x :  34
    y :  34 
  n_players : 3
  Cx_lengthscale : 2
  Cx_noise : 0.001
  Fx_lengthscale : 1
  Fx_noise : 0.001
  Cx_beta : 1.5 # only for visu
  Fx_beta : 1.5
  generate: False   # True, False, walls, None: use some fixed save path
  env_file_name: 'env_data.pkl'
  cov_module: 'Matern'     #'Matern', Sq_exp, 'Poly'

agent:
  Lc : 1.5
  explore_exploit_strategy : 1 # 0: Bernaulli, 1: Directly maximizing coverage obj, 2: 2 stage
  Cx_lengthscale : 2
  Cx_noise : 0.007
  Fx_lengthscale : 2  
  Fx_noise : 0.001
  Cx_beta : 1.5 # 1.5
  Fx_beta : 2.0 #1.5
  mean_shift_val : 2
  use_goose: False
  obs_model : "disc_max_pt"   # disc_center, full_disc, 2 disc_max_pt uncertainity, Bernoulli
  cov_module: 'Matern'     #'Matern', Sq_exp
  recommend: 'UCB'   # 'UCB', 'LCB' 
  Two_stage: False
  sol_domain: "opti"  # keep 2 stage as false

common:
  dim : 2
  constraint : 0.6
  epsilon : 0.25
  disk_size : 8
  # disk_size*step_size = disk volume

algo:
  n_CI_samples : 1
  n_iter: 60
  eps_density_thresh: 0.5 #0.38 
  goose_steps: 150

experiment:
  name: "exploit" # "Bernoulli", "2stage"
  generate_regret_plot : True
