# Supplementary material
Source: ML conference proceedings conference paper supplement (https://proceedings.neurips.cc/paper_files/paper/2022/hash/60dc26558762425a465cb0409fc3dc52-Abstract.html)
Supplement: Supplementary file 1 [file 60dc26558762425a465cb0409fc3dc52-Supplemental-Conference.zip › Near-Optimal Multi-Agent Learning for Safe Coverage Control/code/safe-multi-agent-coverage/requirements.txt]

botorch==0.6.0
debugpy==1.5.1
ffmpeg==1.4
geopy==2.2.0
gpytorch==1.6.0
ipykernel==6.9.2
ipython==8.1.1
jupyter-client==7.1.2
jupyter-core==4.9.2
matplotlib==3.5.1
matplotlib-inline==0.1.3
networkx==2.6.3
numpy==1.22.1
pickleshare==0.7.5
Pillow==7.0.0
PyNaCl==1.3.0
PyYAML==5.3.1
scipy==1.7.3
torch==1.10.1
torchaudio==0.10.1
torchvision==0.11.2
