# Supplementary material
Source: ML conference proceedings conference paper supplement (https://proceedings.neurips.cc/paper_files/paper/2022/hash/60dc26558762425a465cb0409fc3dc52-Abstract.html)
Supplement: Supplementary file 1 [file 60dc26558762425a465cb0409fc3dc52-Supplemental-Conference.zip › Near-Optimal Multi-Agent Learning for Safe Coverage Control/code/safe-multi-agent-coverage/utils/agent_helper.py]

from copy import deepcopy
import numpy as np
import torch
import networkx as nx


def greedy_algorithm_opti(density, graph, n_soln, disk_size):
    # Greedy algorithm
    idx_x_curr = []
    M_dist = []
    record_margin_gain = []
    non_covered_density = torch.empty_like(density).copy_(density)
    node_coverage_gain = {}
    for node in graph.nodes:
        marginal_gain = coverage_oracle(
            node, non_covered_density, graph, disk_size)
        node_coverage_gain[node] = marginal_gain
    for k in range(n_soln):
        idx = max(node_coverage_gain, key=node_coverage_gain.get)
        idx_x_curr.append(idx)
        record_margin_gain.append(node_coverage_gain[idx])
        M_dist.append(node_coverage_gain)
        if k < n_soln-1:
            non_covered_density[list(nx.single_source_shortest_path_length(
                graph, idx_x_curr[-1], cutoff=disk_size))] = 0.0
            affected_locs = list(nx.single_source_shortest_path_length(
                graph, idx_x_curr[-1], cutoff=2*disk_size))
            for node in affected_locs:
                marginal_gain = coverage_oracle(
                    node, non_covered_density, graph, disk_size)
                node_coverage_gain[node] = marginal_gain

    return idx_x_curr, M_dist, torch.sum(torch.stack(record_margin_gain))


def greedy_algorithm(density, graph, n_soln, disk_size):
    # Greedy algorithm
    idx_x_curr = []
    M_dist = []
    record_margin_gain = []
    max_marginal_gain = 0  # id n_sol=0, we still need to pass this value
    non_covered_density = torch.empty_like(density).copy_(density)
    for k in range(n_soln):
        # increase the size of the curr S to include next element
        idx_x_curr.append(0)
        M_dist.append(density)
        max_marginal_gain = -np.inf
        for node in graph.nodes:
            idx_x_curr[-1] = node  # filling in the last due to append
            marginal_gain = coverage_oracle(
                node, non_covered_density, graph, disk_size)
            M_dist[-1][node] = marginal_gain
            if marginal_gain > max_marginal_gain:
                max_marginal_gain = marginal_gain
                best_pos_k = node
        idx_x_curr[-1] = best_pos_k
        record_margin_gain.append(max_marginal_gain)
        non_covered_density[list(nx.single_source_shortest_path_length(
            graph, idx_x_curr[-1], cutoff=disk_size))] = 0.0

    return idx_x_curr, M_dist, torch.sum(torch.stack(record_margin_gain))


def coverage_oracle(idx_x_curr, density, graph, disk_size):
    covarage_area_idx = list(nx.single_source_shortest_path_length(
        graph, idx_x_curr, cutoff=disk_size))
    Fs = torch.sum(density[covarage_area_idx])
    return Fs


def apply_goose(pessimistic_graph, optimistic_graph, grid_V, agent_param, common_param, Cx_model, xi_star):
    # 4) Do safe expansion of the set
    # 4.1)Pick set of points from pessi, which can potentially reduce covariance(where we get some information)
    pessi_loc = grid_V[list(pessimistic_graph.nodes)]
    Sp_lower_Cx, Sp_upper_Cx = Cx_model.posterior(
        pessi_loc).mvn.confidence_region()
    Sp_lower_Cx, Sp_upper_Cx = Sp_lower_Cx.detach(), Sp_upper_Cx.detach()
    Sp_lower_Cx = Sp_lower_Cx * \
        (1+agent_param["Cx_beta"])/2 + \
        Sp_upper_Cx*(1-agent_param["Cx_beta"])/2
    Sp_upper_Cx = Sp_upper_Cx * \
        (1+agent_param["Cx_beta"])/2 + \
        Sp_lower_Cx*(1-agent_param["Cx_beta"])/2
    Wx_eps_t = (
        Sp_upper_Cx - Sp_lower_Cx) > common_param["epsilon"]/2  # *params["agent"]["Cx_beta"]

    # 4.2) Pick some points based on some heuristics example distance metric
    # bool_opti = torch.where((V >= S_opti[agent_key].Xleft) & (
    #     V <= S_opti[agent_key].Xright), True, False)
    # bool_priority = bool_opti * ~bool_pessi

    priority_nodes = list(set(
        optimistic_graph.nodes) - set(pessimistic_graph.nodes))
    A_priority = 1 / \
        (torch.sum(torch.abs(grid_V[priority_nodes] - xi_star), 1) + 1)
    A_x = grid_V[priority_nodes]
    # 4.3) Potential immediate expander set
    x_priority, idx_priority = A_priority.sort(descending=True)

    # fails if x_priority is an empty tensor
    print(x_priority.shape)
    found_a_expander = False
    for i in range(x_priority.shape[0]):
        G_expander = Sp_upper_Cx - agent_param["Lc"] * \
            torch.norm(torch.abs(pessi_loc -
                                 A_x[idx_priority[i]]), dim=1)
        # print("idx_priority",idx_priority[i])
        if torch.any((G_expander > 0)*Wx_eps_t) == True:
            # print(G_expander)
            found_a_expander = True
            break
    if not found_a_expander:
        print("Fully explored, Expansion not possible")
        return xi_star, True  # no expansion possible, yet to think
    w_t = (Sp_upper_Cx - Sp_lower_Cx)*(G_expander > 0)*Wx_eps_t
    query_pt = pessi_loc[w_t.argmax()]
    # query_pt = V[bool_pessi][G_expander.argmax()]
    print("Goose pt", query_pt,
          "current uncertainity", w_t.max())
    # current bug: O goal is on extreme left 10, still coming on left of its pessimistic set, If Lc is low, then the func can't change rapidly, this implies point far away would also get impacted by sampling in pessi set. so it was all good, but Lc limitation
    fully_explored_status = False  # inverse of expander status
    return query_pt, fully_explored_status


# def greedy_algorithm(density, V, n_soln):
#     # Greedy algorithm
#     S_curr = []
#     M_dist = []
#     max_obj = 0  # id n_sol=0, we still need to pass this value
#     for k in range(n_soln):
#         # increase the size of the curr S to include next element
#         S_curr.append([0])
#         M_dist.append(np.random.random((V.shape[0], 1)))
#         max_obj = -np.inf
#         for i in range(V.shape[0]):
#             S_curr[-1] = [i]  # filling in the last due to append
#             obj_i = objective_oracle_given(S_curr, density)
#             M_dist[-1][i] = obj_i.detach().numpy()
#             if obj_i > max_obj:
#                 # print("The changed obj is for", k, "agent from", max_obj,
#                 #       "to", obj_ij, "Loc from", S_curr[-1], "to", [i, j])
#                 max_obj = obj_i

#                 best_pos_k = [i]
#         S_curr[-1] = best_pos_k

#     idx_xn_star = S_curr
#     xn_star = V[[idx_xn_star]].reshape(-1)
#     yn_star = density[[idx_xn_star]].reshape(-1)
#     return xn_star, yn_star, M_dist, max_obj


# def objective_oracle_given(S_curr, density):
#     Fs = 0
#     Rad_idx = 5  # 1,2,3,4,5  ..curr.. 5,4,3,2,1 #
#     covarage_area = density > np.inf  # intialize with false
#     for agent_idx in S_curr:
#         disk_left = np.max((agent_idx[0]-Rad_idx, 0))
#         disk_right = np.min((agent_idx[0]+Rad_idx, density.shape[0]-1))
#         covarage_area[disk_left:disk_right+1] = torch.ones(
#             disk_right+1-disk_left) < 2
#     Fs = torch.sum(covarage_area*density)
#     return Fs


def objective_oracle_given_pos(S_curr, density, V):
    Rad = 5*0.12
    Fs = 0
    agents_disk = []
    for agent_loc in S_curr:
        agent_loc = agent_loc[0]
        agent_left = agent_loc - Rad
        agent_right = agent_loc + Rad
        left_condn = torch.logical_or(V > agent_left, torch.isclose(
            V, agent_left))
        right_condn = torch.logical_or(V < agent_right, torch.isclose(
            V, agent_right))
        agents_disk.append(torch.logical_and(left_condn, right_condn))

    covarage_area = V > float('inf')  # intialize with false
    for agent_cover in agents_disk:
        covarage_area = torch.logical_or(covarage_area, agent_cover)

    Fs = torch.sum(covarage_area*density)
    return Fs


def d_func(x, y):
    return np.abs((x[0]-y[0]))


def get_nearest_agent(v, S):
    agent_index = 10
    min_dist = np.inf
    for k in S:
        temp = d_func(v, k)
        if temp < min_dist:
            min_dist = temp
            agent_index = k
    return agent_index, min_dist
