# Supplementary material
Source: ML conference proceedings conference paper supplement (https://proceedings.neurips.cc/paper_files/paper/2022/hash/60dc26558762425a465cb0409fc3dc52-Abstract.html)
Supplement: Supplementary file 1 [file 60dc26558762425a465cb0409fc3dc52-Supplemental-Conference.zip › Near-Optimal Multi-Agent Learning for Safe Coverage Control/code/safe-multi-agent-coverage/utils/initializer.py]

from utils.agent import Agent


def get_players_initialized(train, params, grid_V):
    players = []
    init_safe = train["Cx_X"]
    for i in range(params["env"]["n_players"]):
        # instantiate players object
        players.append(Agent(i, train["Cx_X"][i], train["Cx_Y"][i], train["Fx_Y"][i],
                             params["agent"], params["common"], grid_V, params["env"]))
        # player i will get to know about the samples collected by other agents using communicate function
        players[i].communicate_constraint(
            train["Cx_X"][:i]+train["Cx_X"][i+1:], train["Cx_Y"][:i]+train["Cx_Y"][i+1:])
        players[i].communicate_density(
            train["Fx_X"][:i]+train["Fx_X"][i+1:], train["Fx_Y"][:i]+train["Fx_Y"][i+1:])
    return players
