# Supplementary material
Source: ML conference proceedings conference paper supplement (https://proceedings.neurips.cc/paper_files/paper/2022/hash/60dc26558762425a465cb0409fc3dc52-Abstract.html)

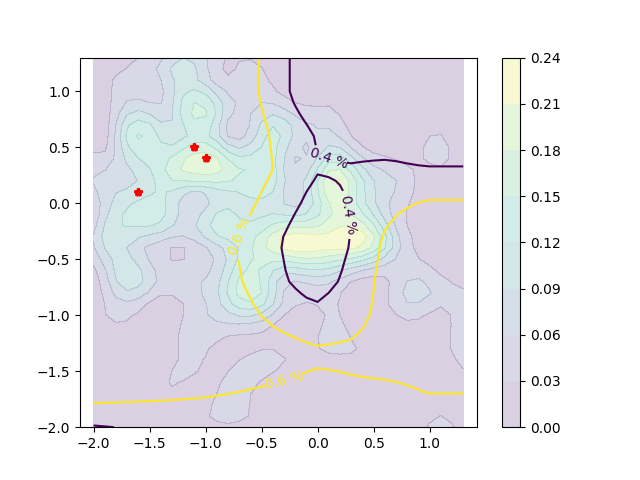

Supplement: Supplementary file 1 [file 60dc26558762425a465cb0409fc3dc52-Supplemental-Conference.zip › Near-Optimal Multi-Agent Learning for Safe Coverage Control/code/safe-multi-agent-coverage/experiments/gorilla/environments/env_3/env.png]

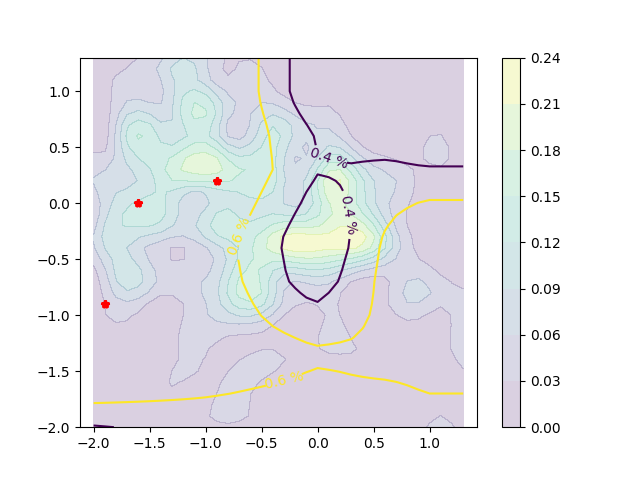

Supplement: Supplementary file 1 [file 60dc26558762425a465cb0409fc3dc52-Supplemental-Conference.zip › Near-Optimal Multi-Agent Learning for Safe Coverage Control/code/safe-multi-agent-coverage/experiments/gorilla/environments/env_10/env.png]

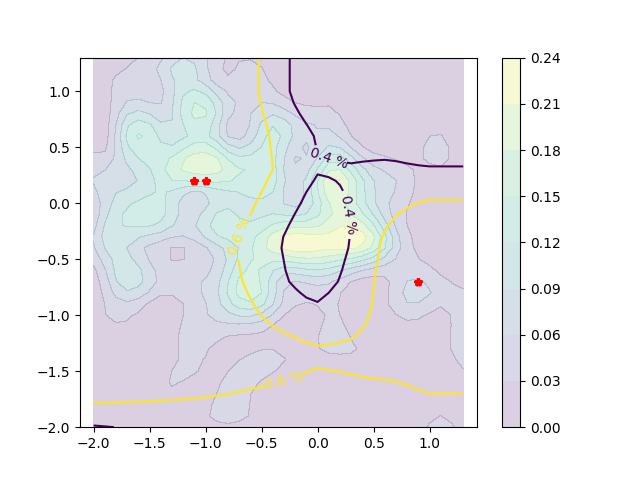

Supplement: Supplementary file 1 [file 60dc26558762425a465cb0409fc3dc52-Supplemental-Conference.zip › Near-Optimal Multi-Agent Learning for Safe Coverage Control/code/safe-multi-agent-coverage/experiments/gorilla/environments/env_1/env.png]

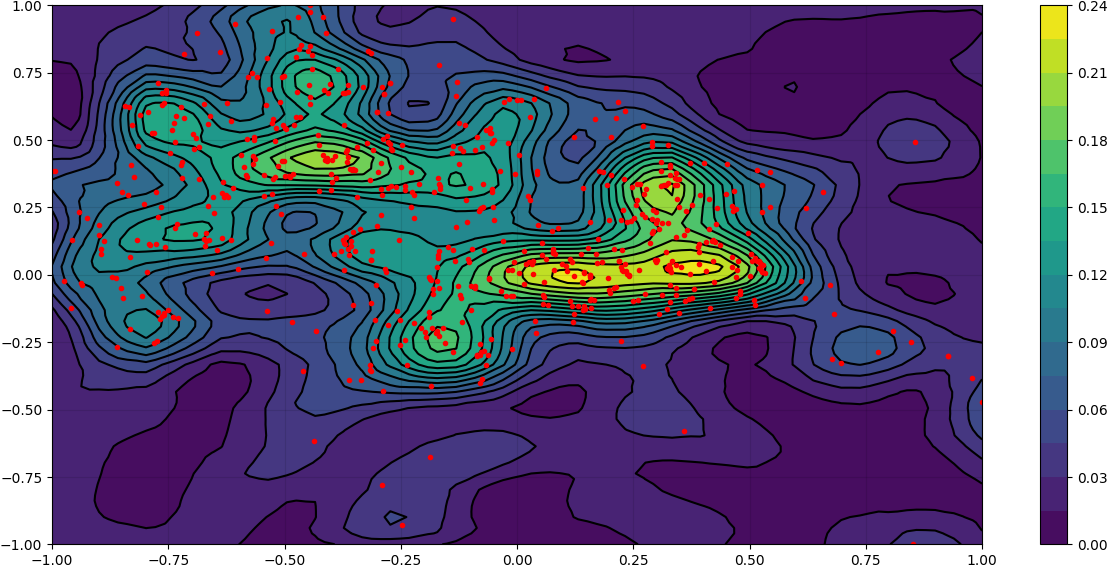

Supplement: Supplementary file 1 [file 60dc26558762425a465cb0409fc3dc52-Supplemental-Conference.zip › Near-Optimal Multi-Agent Learning for Safe Coverage Control/code/safe-multi-agent-coverage/experiments/gorilla/environments/env_1/name.png]

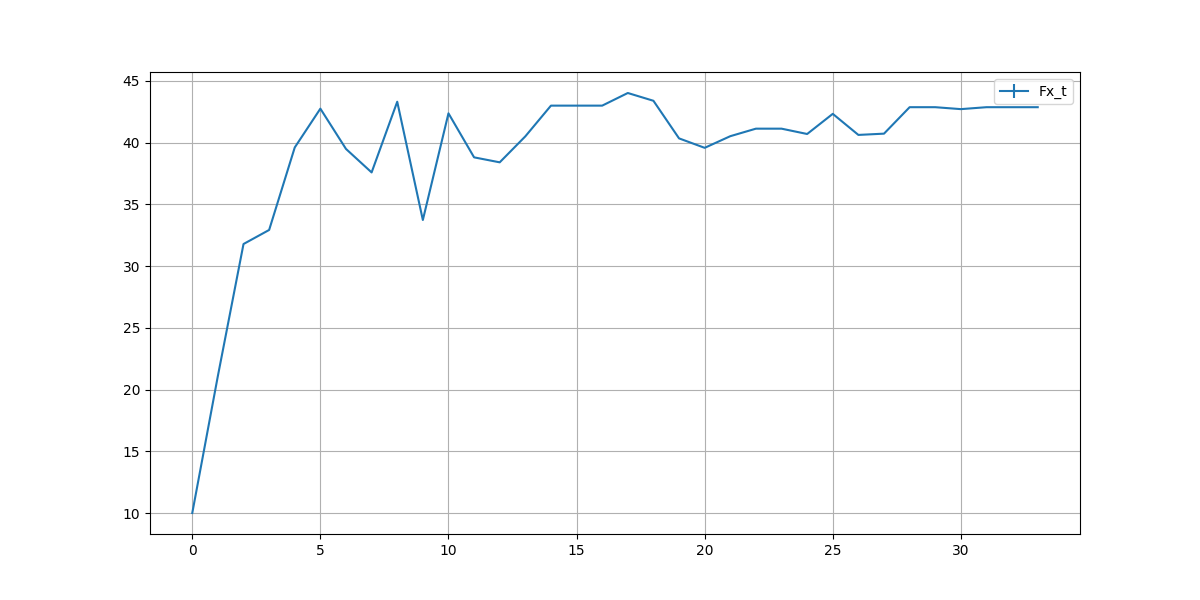

Supplement: Supplementary file 1 [file 60dc26558762425a465cb0409fc3dc52-Supplemental-Conference.zip › Near-Optimal Multi-Agent Learning for Safe Coverage Control/code/safe-multi-agent-coverage/experiments/gorilla/environments/env_1/smcc_MacOpt_gorilla/1/Fx.png]

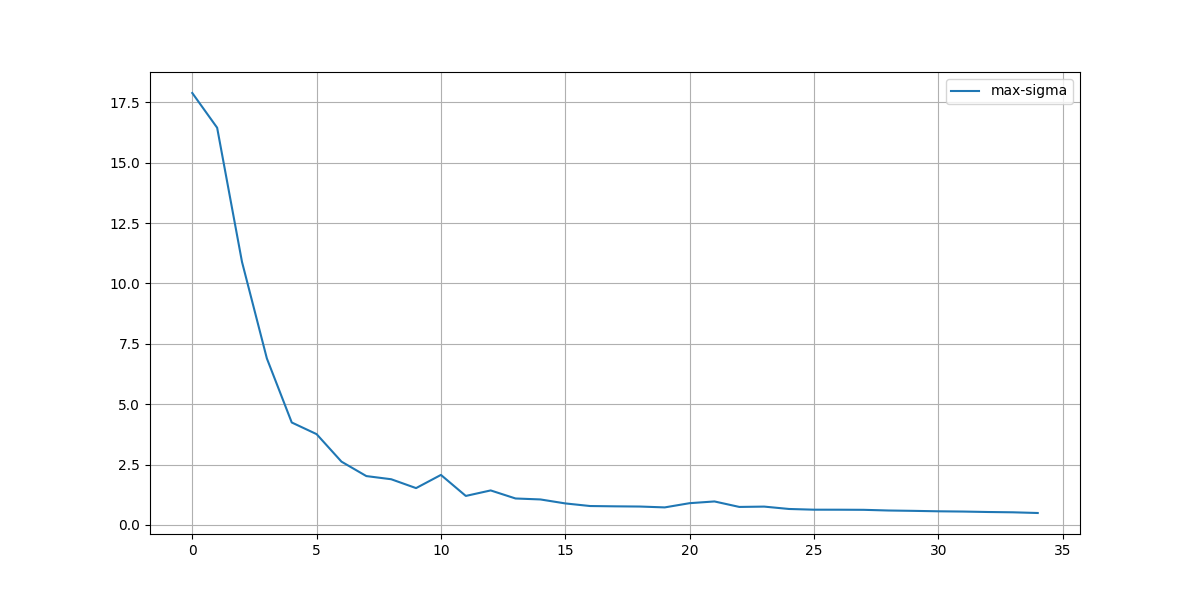

Supplement: Supplementary file 1 [file 60dc26558762425a465cb0409fc3dc52-Supplemental-Conference.zip › Near-Optimal Multi-Agent Learning for Safe Coverage Control/code/safe-multi-agent-coverage/experiments/gorilla/environments/env_1/smcc_MacOpt_gorilla/1/sigma.png]

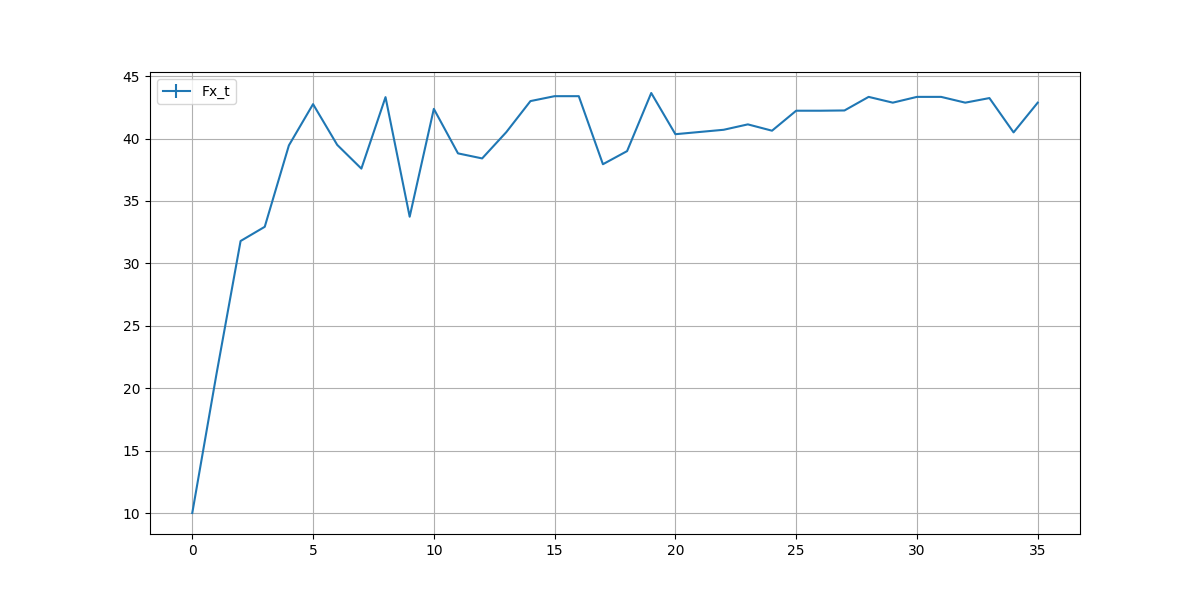

Supplement: Supplementary file 1 [file 60dc26558762425a465cb0409fc3dc52-Supplemental-Conference.zip › Near-Optimal Multi-Agent Learning for Safe Coverage Control/code/safe-multi-agent-coverage/experiments/gorilla/environments/env_1/smcc_MacOpt_gorilla/0/Fx.png]

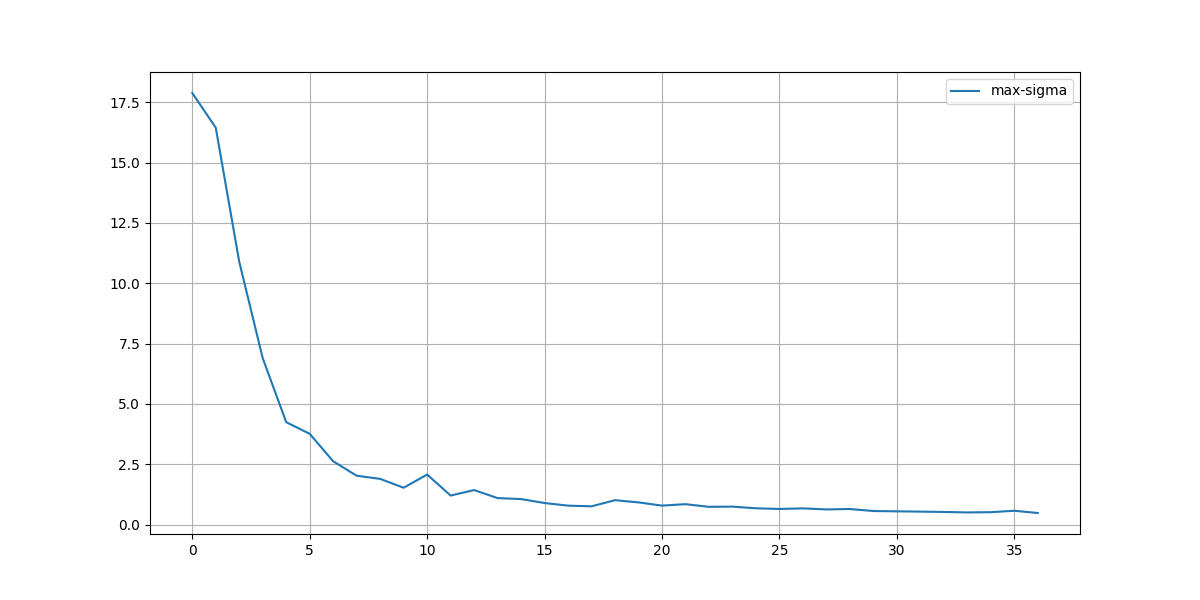

Supplement: Supplementary file 1 [file 60dc26558762425a465cb0409fc3dc52-Supplemental-Conference.zip › Near-Optimal Multi-Agent Learning for Safe Coverage Control/code/safe-multi-agent-coverage/experiments/gorilla/environments/env_1/smcc_MacOpt_gorilla/0/sigma.png]

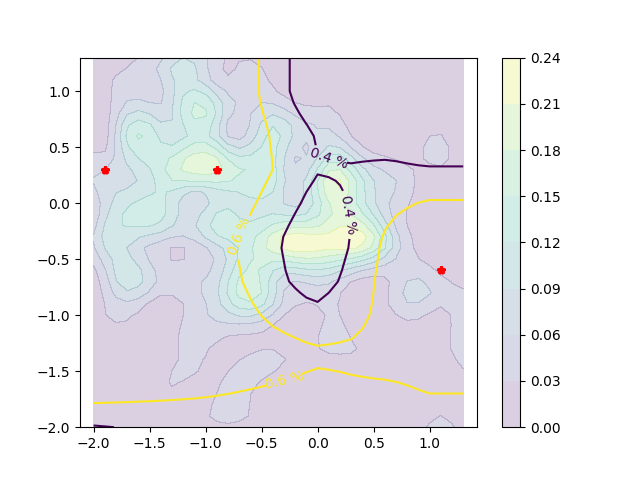

Supplement: Supplementary file 1 [file 60dc26558762425a465cb0409fc3dc52-Supplemental-Conference.zip › Near-Optimal Multi-Agent Learning for Safe Coverage Control/code/safe-multi-agent-coverage/experiments/gorilla/environments/env_2/env.png]

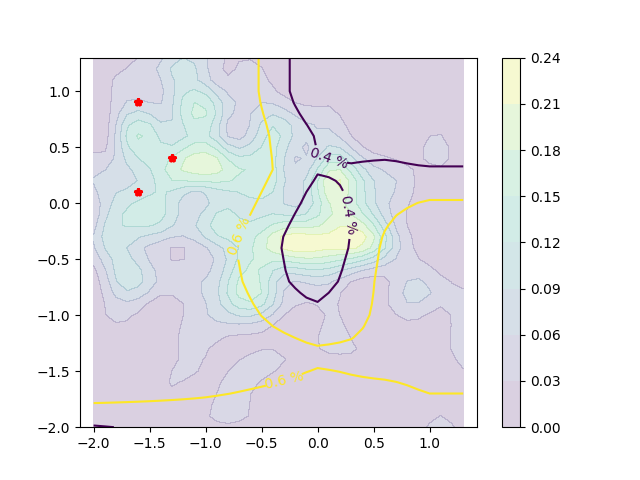

Supplement: Supplementary file 1 [file 60dc26558762425a465cb0409fc3dc52-Supplemental-Conference.zip › Near-Optimal Multi-Agent Learning for Safe Coverage Control/code/safe-multi-agent-coverage/experiments/gorilla/environments/env_4/env.png]

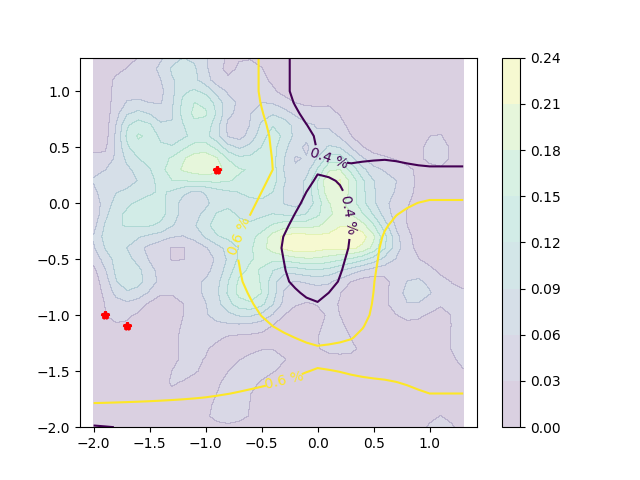

Supplement: Supplementary file 1 [file 60dc26558762425a465cb0409fc3dc52-Supplemental-Conference.zip › Near-Optimal Multi-Agent Learning for Safe Coverage Control/code/safe-multi-agent-coverage/experiments/gorilla/environments/env_5/env.png]

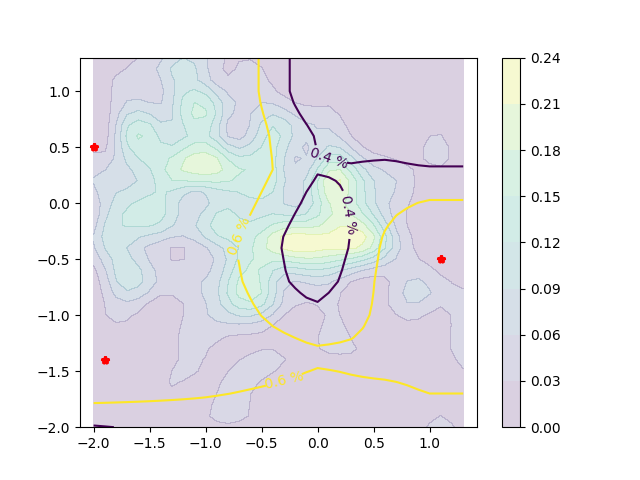

Supplement: Supplementary file 1 [file 60dc26558762425a465cb0409fc3dc52-Supplemental-Conference.zip › Near-Optimal Multi-Agent Learning for Safe Coverage Control/code/safe-multi-agent-coverage/experiments/gorilla/environments/env_6/env.png]

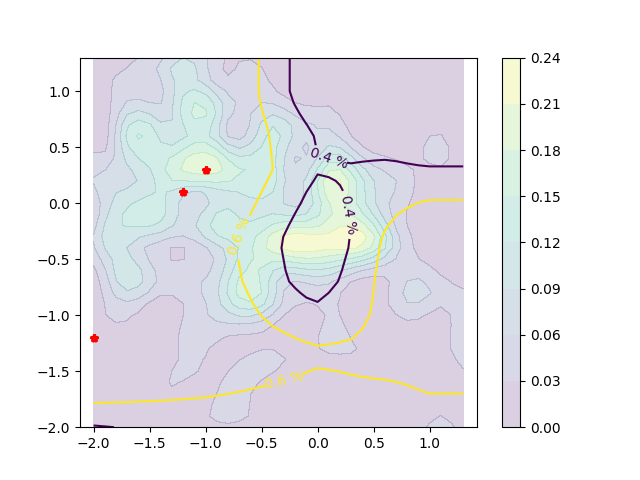

Supplement: Supplementary file 1 [file 60dc26558762425a465cb0409fc3dc52-Supplemental-Conference.zip › Near-Optimal Multi-Agent Learning for Safe Coverage Control/code/safe-multi-agent-coverage/experiments/gorilla/environments/env_7/env.png]

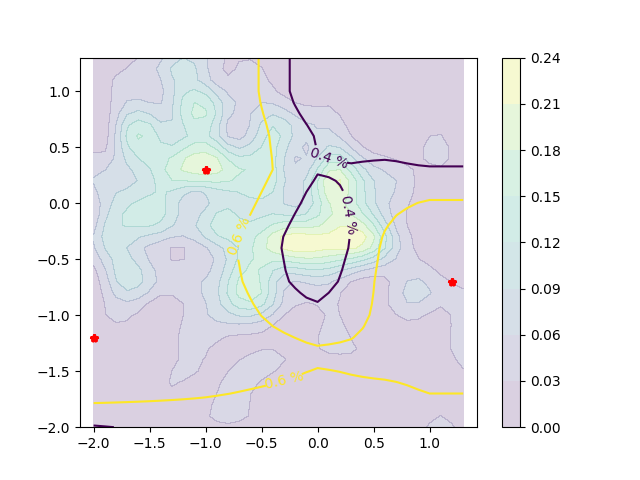

Supplement: Supplementary file 1 [file 60dc26558762425a465cb0409fc3dc52-Supplemental-Conference.zip › Near-Optimal Multi-Agent Learning for Safe Coverage Control/code/safe-multi-agent-coverage/experiments/gorilla/environments/env_8/env.png]

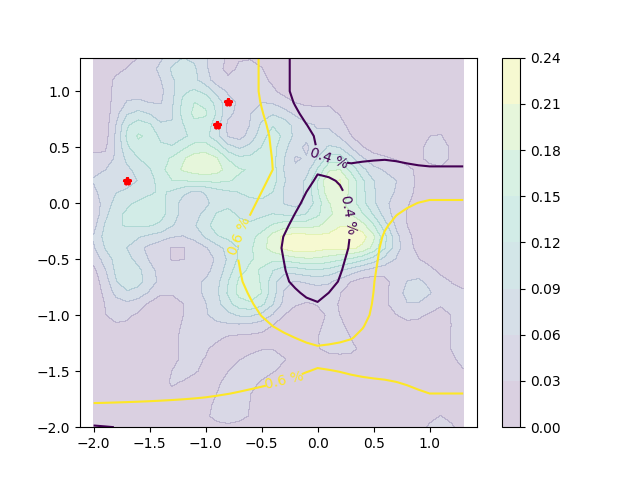

Supplement: Supplementary file 1 [file 60dc26558762425a465cb0409fc3dc52-Supplemental-Conference.zip › Near-Optimal Multi-Agent Learning for Safe Coverage Control/code/safe-multi-agent-coverage/experiments/gorilla/environments/env_9/env.png]

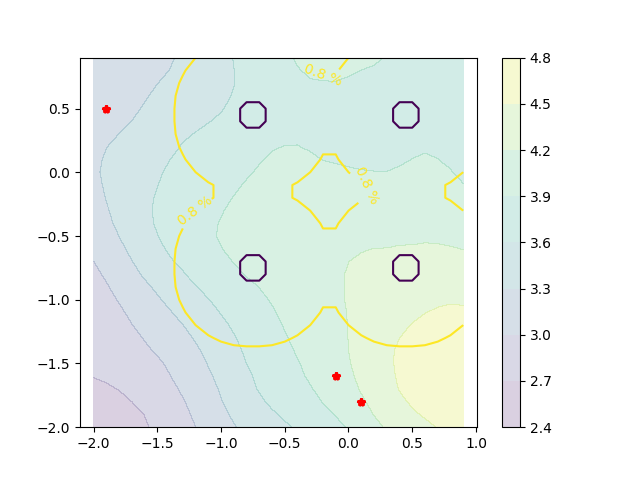

Supplement: Supplementary file 1 [file 60dc26558762425a465cb0409fc3dc52-Supplemental-Conference.zip › Near-Optimal Multi-Agent Learning for Safe Coverage Control/code/safe-multi-agent-coverage/experiments/obstacles/environments/env_3/env.png]

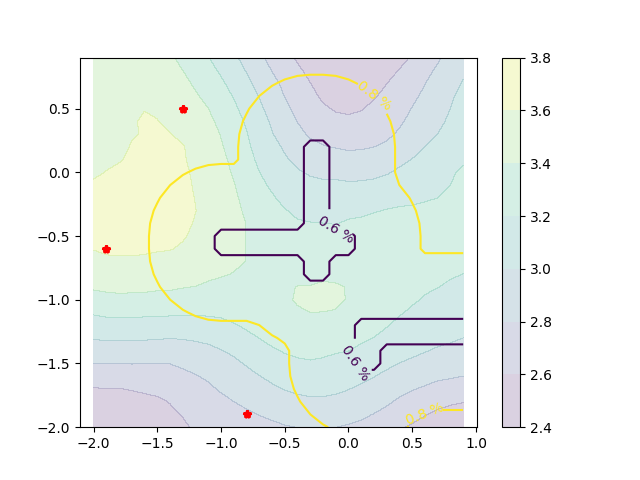

Supplement: Supplementary file 1 [file 60dc26558762425a465cb0409fc3dc52-Supplemental-Conference.zip › Near-Optimal Multi-Agent Learning for Safe Coverage Control/code/safe-multi-agent-coverage/experiments/obstacles/environments/env_0/env.png]

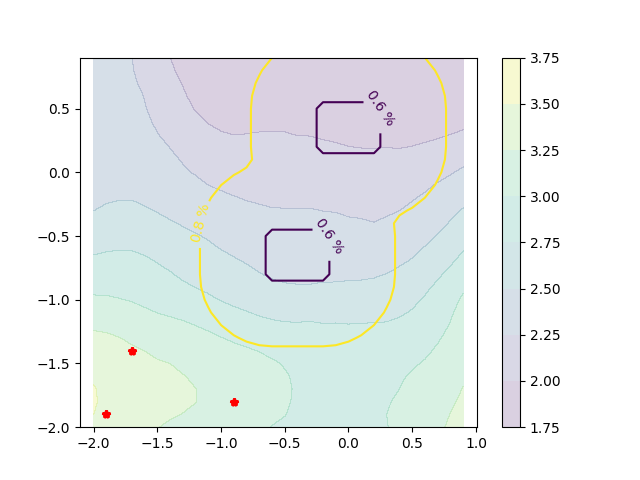

Supplement: Supplementary file 1 [file 60dc26558762425a465cb0409fc3dc52-Supplemental-Conference.zip › Near-Optimal Multi-Agent Learning for Safe Coverage Control/code/safe-multi-agent-coverage/experiments/obstacles/environments/env_4/env.png]

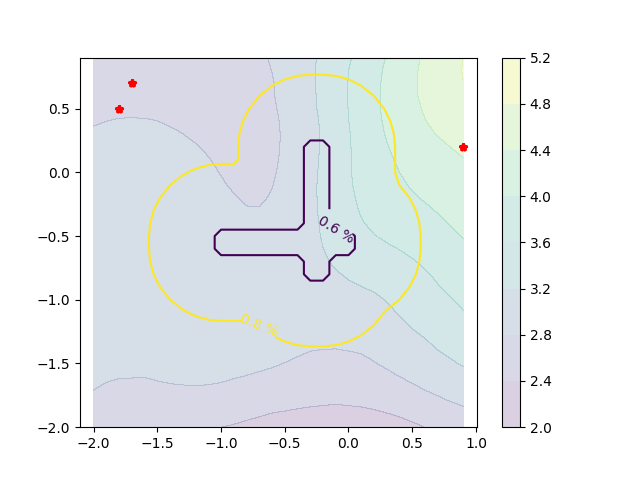

Supplement: Supplementary file 1 [file 60dc26558762425a465cb0409fc3dc52-Supplemental-Conference.zip › Near-Optimal Multi-Agent Learning for Safe Coverage Control/code/safe-multi-agent-coverage/experiments/obstacles/environments/env_1/env.png]

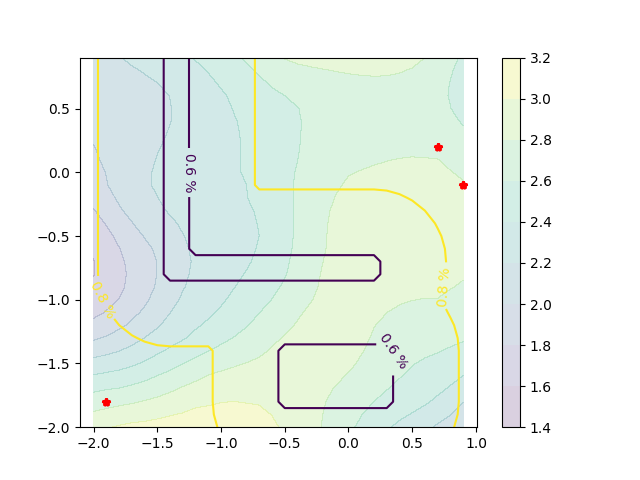

Supplement: Supplementary file 1 [file 60dc26558762425a465cb0409fc3dc52-Supplemental-Conference.zip › Near-Optimal Multi-Agent Learning for Safe Coverage Control/code/safe-multi-agent-coverage/experiments/obstacles/environments/env_10/env.png]

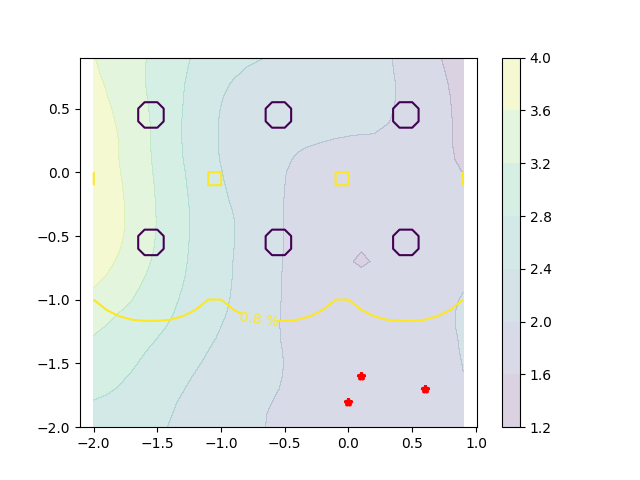

Supplement: Supplementary file 1 [file 60dc26558762425a465cb0409fc3dc52-Supplemental-Conference.zip › Near-Optimal Multi-Agent Learning for Safe Coverage Control/code/safe-multi-agent-coverage/experiments/obstacles/environments/env_7/env.png]

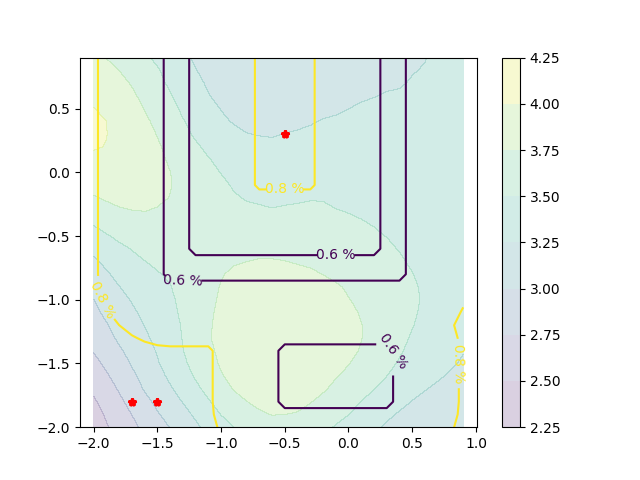

Supplement: Supplementary file 1 [file 60dc26558762425a465cb0409fc3dc52-Supplemental-Conference.zip › Near-Optimal Multi-Agent Learning for Safe Coverage Control/code/safe-multi-agent-coverage/experiments/obstacles/environments/env_8/env.png]

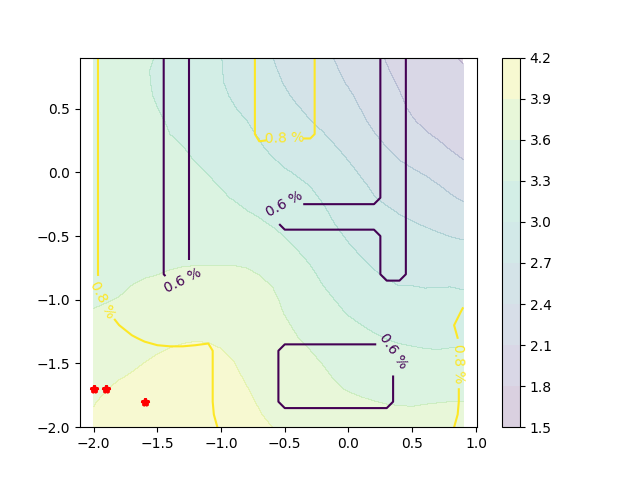

Supplement: Supplementary file 1 [file 60dc26558762425a465cb0409fc3dc52-Supplemental-Conference.zip › Near-Optimal Multi-Agent Learning for Safe Coverage Control/code/safe-multi-agent-coverage/experiments/obstacles/environments/env_9/env.png]

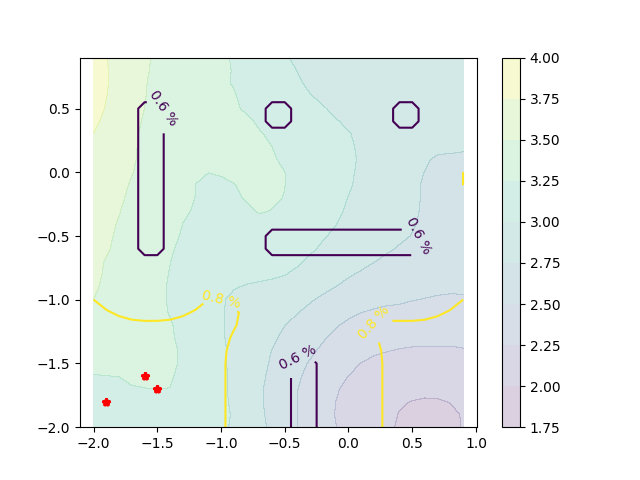

Supplement: Supplementary file 1 [file 60dc26558762425a465cb0409fc3dc52-Supplemental-Conference.zip › Near-Optimal Multi-Agent Learning for Safe Coverage Control/code/safe-multi-agent-coverage/experiments/obstacles/environments/env_2/env.png]

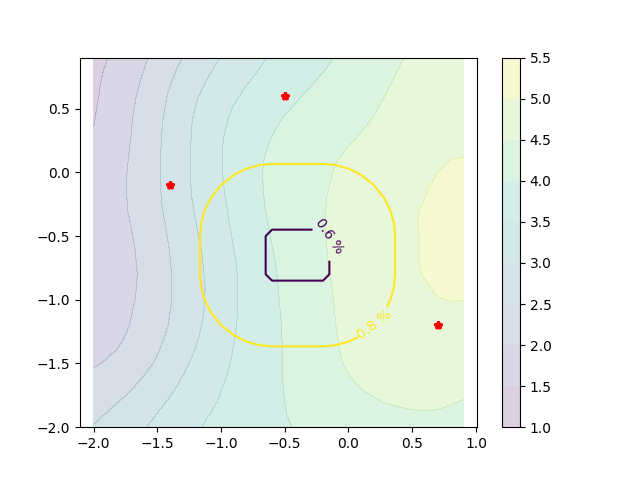

Supplement: Supplementary file 1 [file 60dc26558762425a465cb0409fc3dc52-Supplemental-Conference.zip › Near-Optimal Multi-Agent Learning for Safe Coverage Control/code/safe-multi-agent-coverage/experiments/obstacles/environments/env_5/env.png]

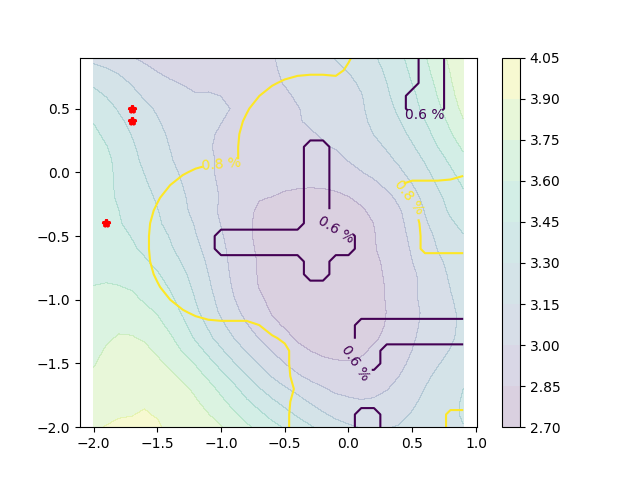

Supplement: Supplementary file 1 [file 60dc26558762425a465cb0409fc3dc52-Supplemental-Conference.zip › Near-Optimal Multi-Agent Learning for Safe Coverage Control/code/safe-multi-agent-coverage/experiments/obstacles/environments/env_6/env.png]

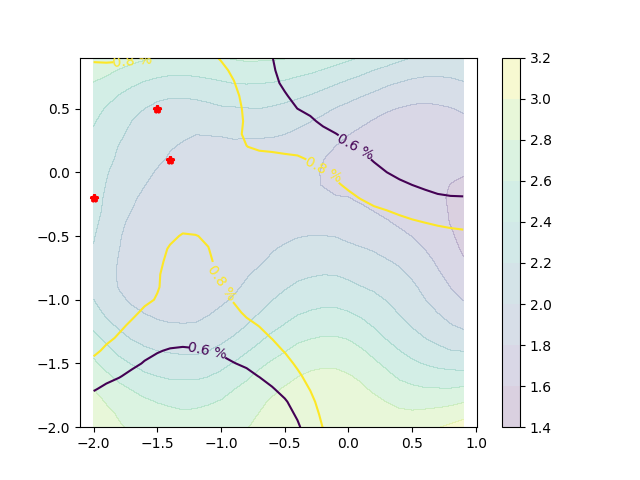

Supplement: Supplementary file 1 [file 60dc26558762425a465cb0409fc3dc52-Supplemental-Conference.zip › Near-Optimal Multi-Agent Learning for Safe Coverage Control/code/safe-multi-agent-coverage/experiments/GP/environments/env_0/env.png]

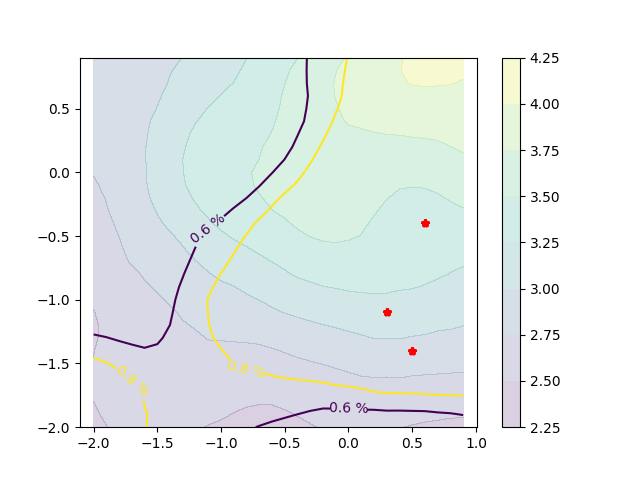

Supplement: Supplementary file 1 [file 60dc26558762425a465cb0409fc3dc52-Supplemental-Conference.zip › Near-Optimal Multi-Agent Learning for Safe Coverage Control/code/safe-multi-agent-coverage/experiments/GP/environments/env_11/env.png]

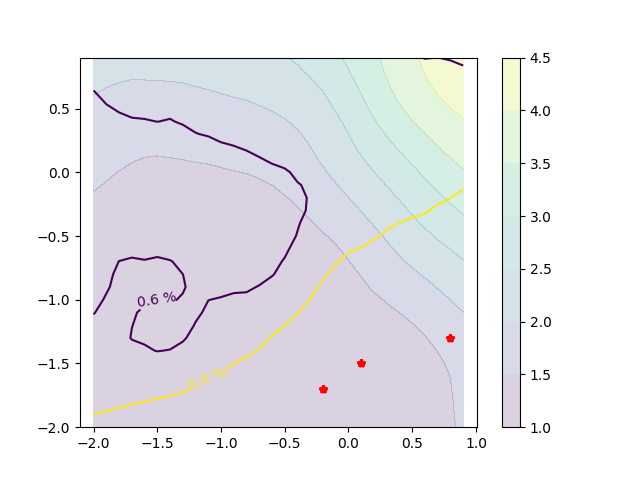

Supplement: Supplementary file 1 [file 60dc26558762425a465cb0409fc3dc52-Supplemental-Conference.zip › Near-Optimal Multi-Agent Learning for Safe Coverage Control/code/safe-multi-agent-coverage/experiments/GP/environments/env_1/env.png]

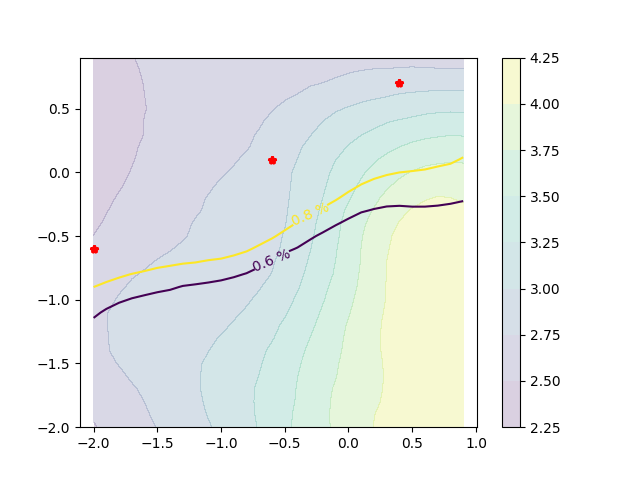

Supplement: Supplementary file 1 [file 60dc26558762425a465cb0409fc3dc52-Supplemental-Conference.zip › Near-Optimal Multi-Agent Learning for Safe Coverage Control/code/safe-multi-agent-coverage/experiments/GP/environments/env_10/env.png]

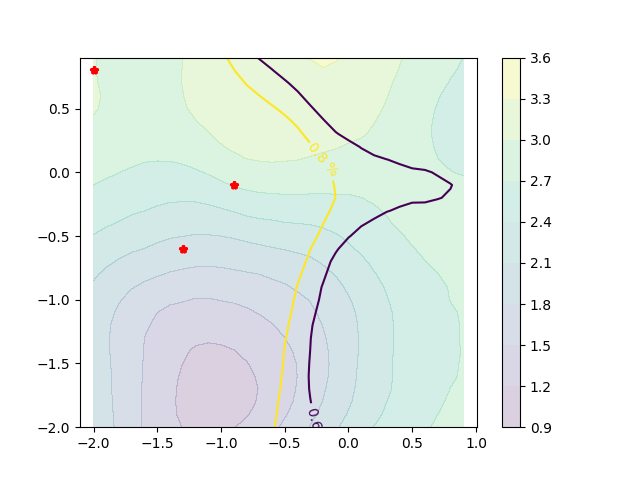

Supplement: Supplementary file 1 [file 60dc26558762425a465cb0409fc3dc52-Supplemental-Conference.zip › Near-Optimal Multi-Agent Learning for Safe Coverage Control/code/safe-multi-agent-coverage/experiments/GP/environments/env_14/env.png]

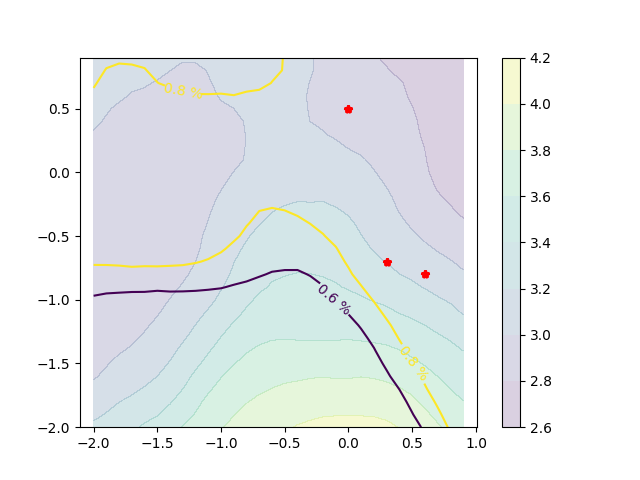

Supplement: Supplementary file 1 [file 60dc26558762425a465cb0409fc3dc52-Supplemental-Conference.zip › Near-Optimal Multi-Agent Learning for Safe Coverage Control/code/safe-multi-agent-coverage/experiments/GP/environments/env_12/env.png]

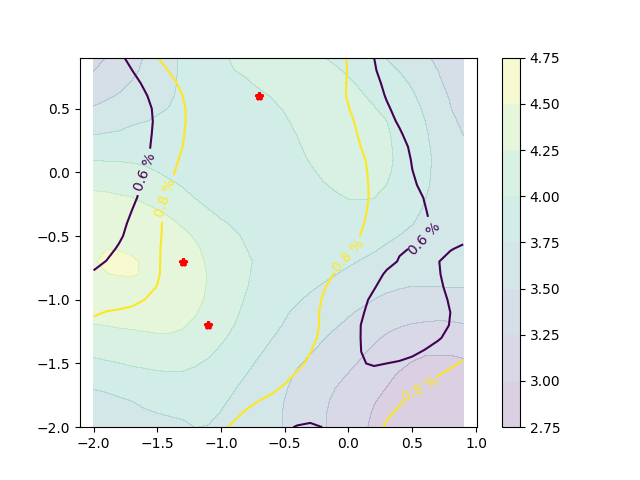

Supplement: Supplementary file 1 [file 60dc26558762425a465cb0409fc3dc52-Supplemental-Conference.zip › Near-Optimal Multi-Agent Learning for Safe Coverage Control/code/safe-multi-agent-coverage/experiments/GP/environments/env_13/env.png]

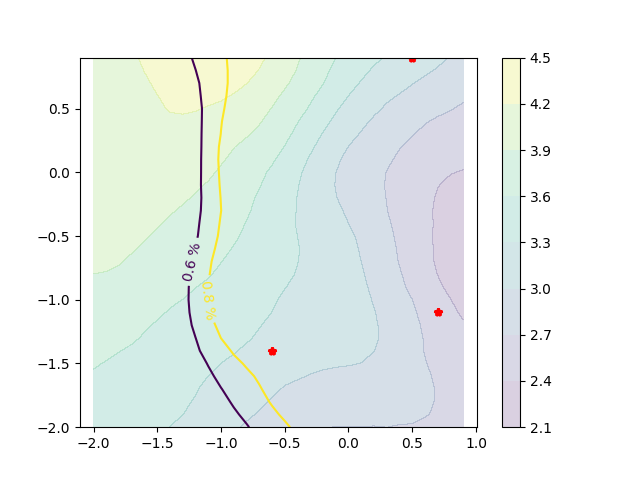

Supplement: Supplementary file 1 [file 60dc26558762425a465cb0409fc3dc52-Supplemental-Conference.zip › Near-Optimal Multi-Agent Learning for Safe Coverage Control/code/safe-multi-agent-coverage/experiments/GP/environments/env_16/env.png]

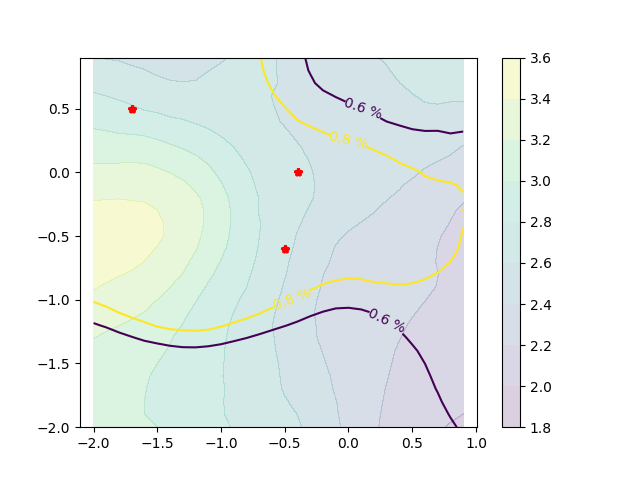

Supplement: Supplementary file 1 [file 60dc26558762425a465cb0409fc3dc52-Supplemental-Conference.zip › Near-Optimal Multi-Agent Learning for Safe Coverage Control/code/safe-multi-agent-coverage/experiments/GP/environments/env_15/env.png]

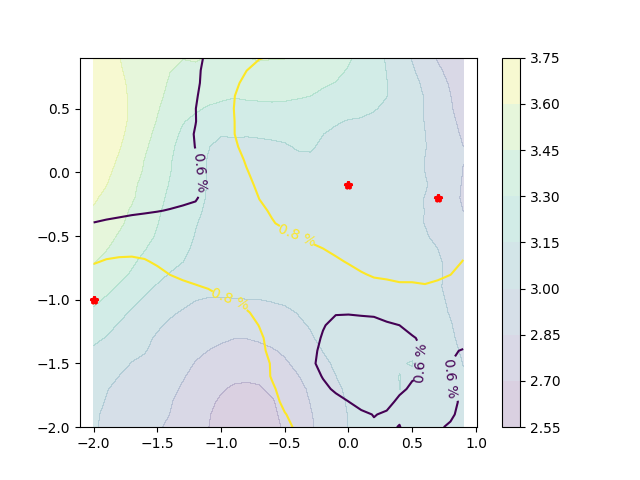

Supplement: Supplementary file 1 [file 60dc26558762425a465cb0409fc3dc52-Supplemental-Conference.zip › Near-Optimal Multi-Agent Learning for Safe Coverage Control/code/safe-multi-agent-coverage/experiments/GP/environments/env_17/env.png]

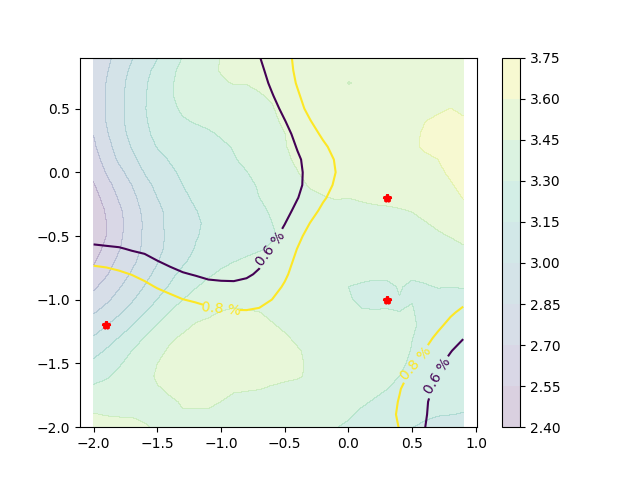

Supplement: Supplementary file 1 [file 60dc26558762425a465cb0409fc3dc52-Supplemental-Conference.zip › Near-Optimal Multi-Agent Learning for Safe Coverage Control/code/safe-multi-agent-coverage/experiments/GP/environments/env_18/env.png]

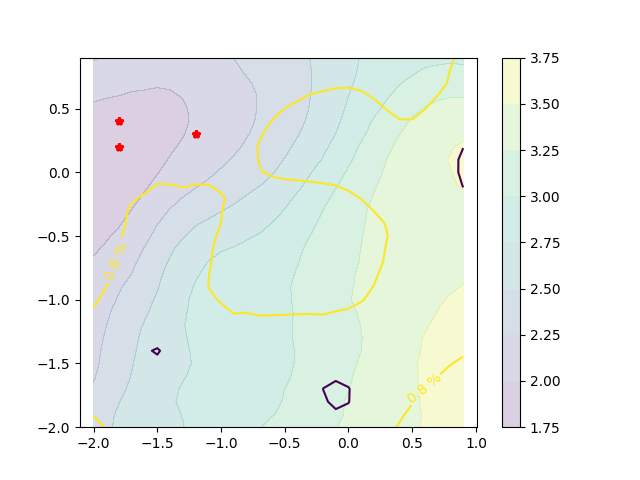

Supplement: Supplementary file 1 [file 60dc26558762425a465cb0409fc3dc52-Supplemental-Conference.zip › Near-Optimal Multi-Agent Learning for Safe Coverage Control/code/safe-multi-agent-coverage/experiments/GP/environments/env_21/env.png]

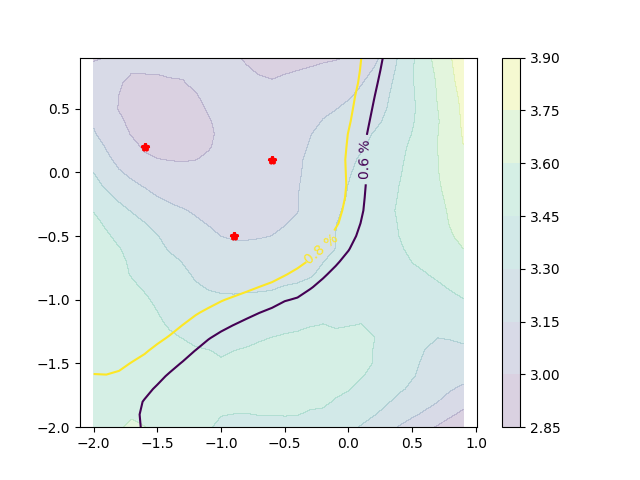

Supplement: Supplementary file 1 [file 60dc26558762425a465cb0409fc3dc52-Supplemental-Conference.zip › Near-Optimal Multi-Agent Learning for Safe Coverage Control/code/safe-multi-agent-coverage/experiments/GP/environments/env_22/env.png]

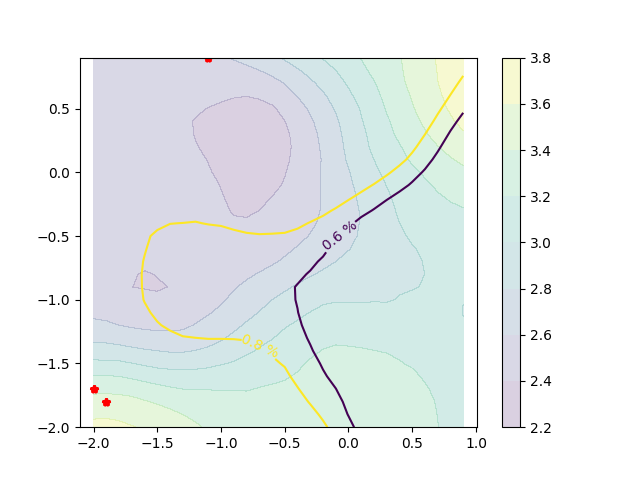

Supplement: Supplementary file 1 [file 60dc26558762425a465cb0409fc3dc52-Supplemental-Conference.zip › Near-Optimal Multi-Agent Learning for Safe Coverage Control/code/safe-multi-agent-coverage/experiments/GP/environments/env_23/env.png]

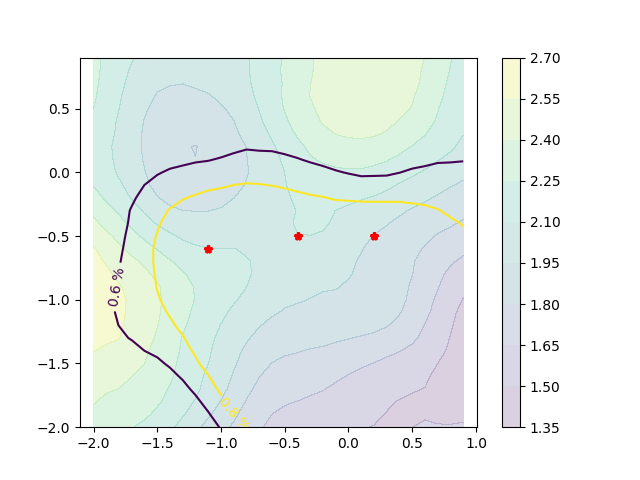

Supplement: Supplementary file 1 [file 60dc26558762425a465cb0409fc3dc52-Supplemental-Conference.zip › Near-Optimal Multi-Agent Learning for Safe Coverage Control/code/safe-multi-agent-coverage/experiments/GP/environments/env_24/env.png]

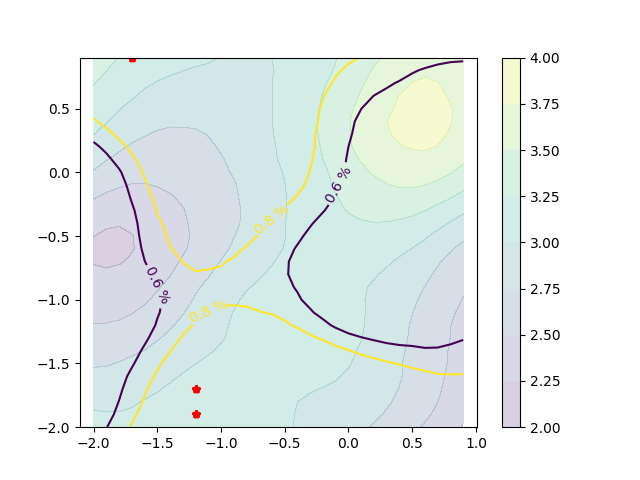

Supplement: Supplementary file 1 [file 60dc26558762425a465cb0409fc3dc52-Supplemental-Conference.zip › Near-Optimal Multi-Agent Learning for Safe Coverage Control/code/safe-multi-agent-coverage/experiments/GP/environments/env_25/env.png]

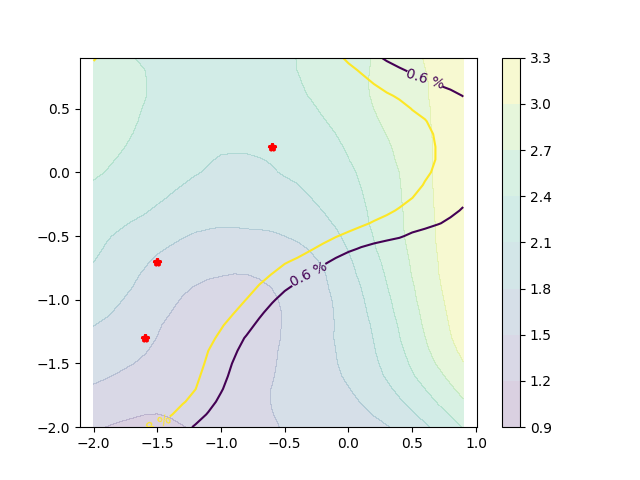

Supplement: Supplementary file 1 [file 60dc26558762425a465cb0409fc3dc52-Supplemental-Conference.zip › Near-Optimal Multi-Agent Learning for Safe Coverage Control/code/safe-multi-agent-coverage/experiments/GP/environments/env_26/env.png]

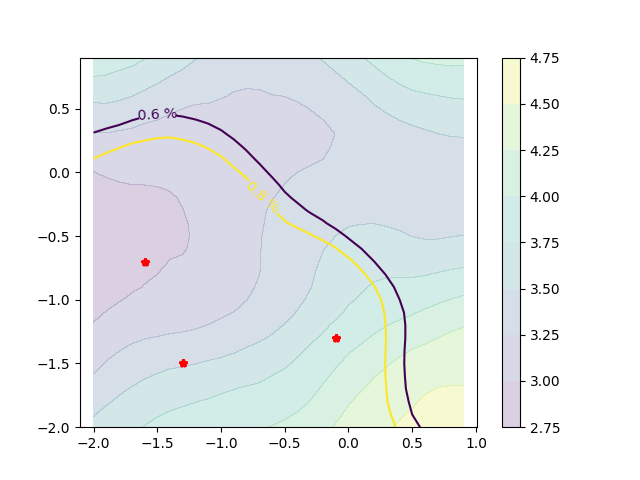

Supplement: Supplementary file 1 [file 60dc26558762425a465cb0409fc3dc52-Supplemental-Conference.zip › Near-Optimal Multi-Agent Learning for Safe Coverage Control/code/safe-multi-agent-coverage/experiments/GP/environments/env_28/env.png]

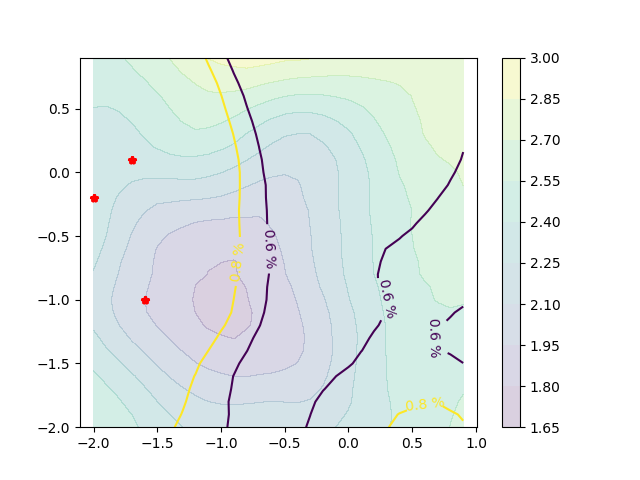

Supplement: Supplementary file 1 [file 60dc26558762425a465cb0409fc3dc52-Supplemental-Conference.zip › Near-Optimal Multi-Agent Learning for Safe Coverage Control/code/safe-multi-agent-coverage/experiments/GP/environments/env_27/env.png]

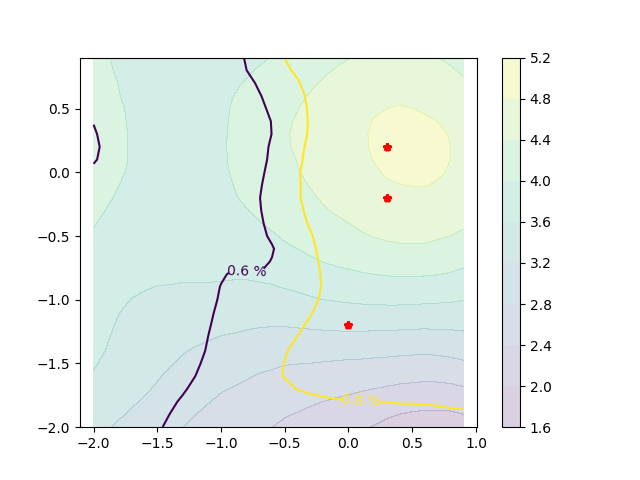

Supplement: Supplementary file 1 [file 60dc26558762425a465cb0409fc3dc52-Supplemental-Conference.zip › Near-Optimal Multi-Agent Learning for Safe Coverage Control/code/safe-multi-agent-coverage/experiments/GP/environments/env_29/env.png]

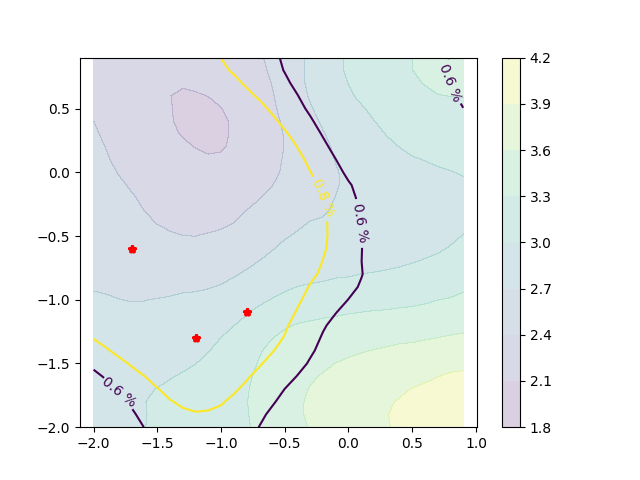

Supplement: Supplementary file 1 [file 60dc26558762425a465cb0409fc3dc52-Supplemental-Conference.zip › Near-Optimal Multi-Agent Learning for Safe Coverage Control/code/safe-multi-agent-coverage/experiments/GP/environments/env_3/env.png]

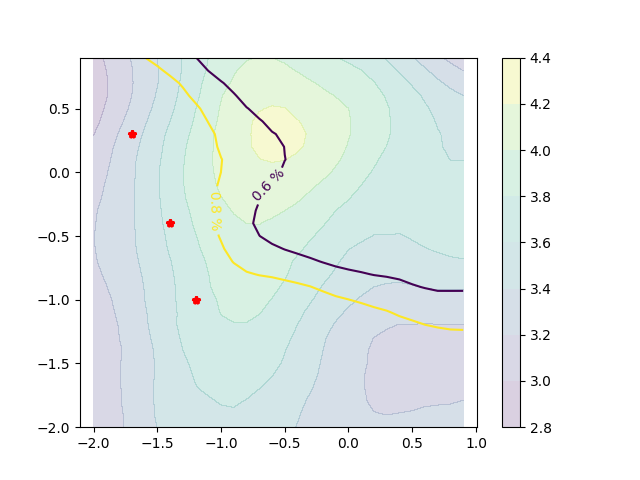

Supplement: Supplementary file 1 [file 60dc26558762425a465cb0409fc3dc52-Supplemental-Conference.zip › Near-Optimal Multi-Agent Learning for Safe Coverage Control/code/safe-multi-agent-coverage/experiments/GP/environments/env_30/env.png]
